# Supplementary material for: Four putative SWI2/SNF2 chromatin remodelers have dual roles in regulating DNA methylation in Arabidopsis
Source: PubMed Central journal article supplement (PMC6189096; doi:10.1038/s41421-018-0056-8), 2018-10-16
Supplement: 41421_2018_56_MOESM1_ESM.pdf [file 41421_2018_56_MOESM1_ESM.pdf]

# Supplementary Figure 1

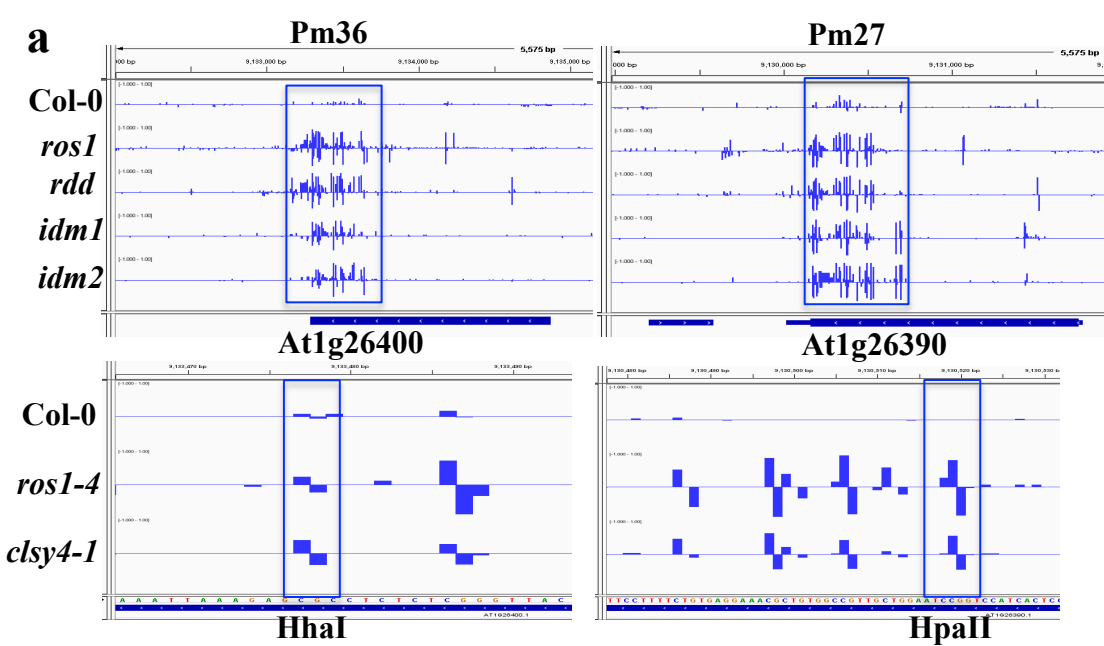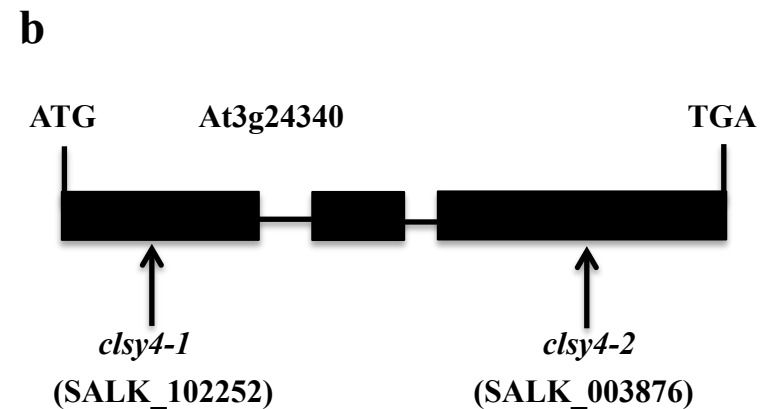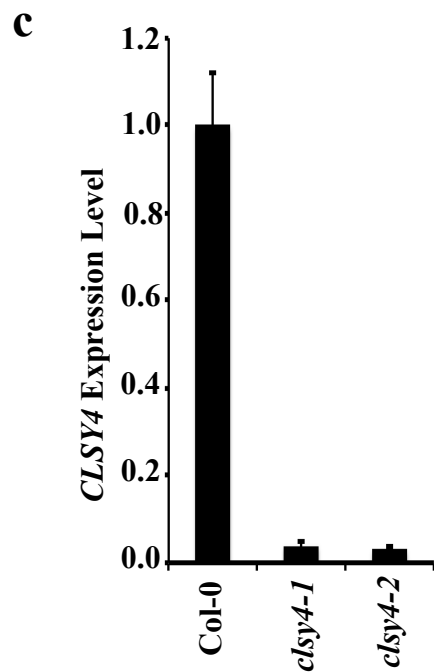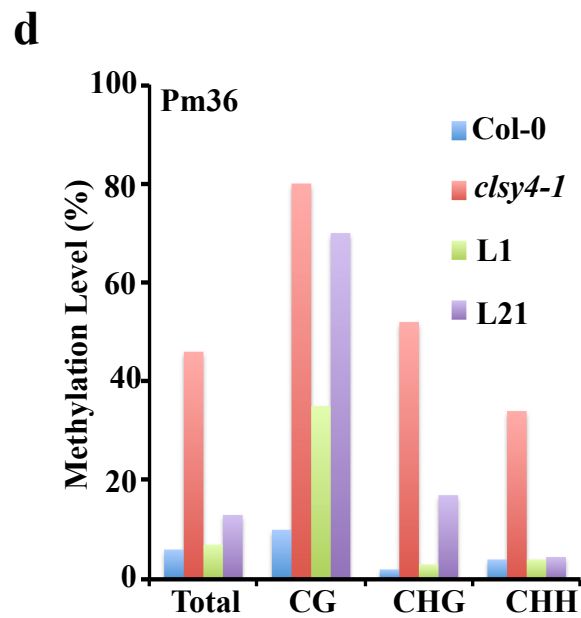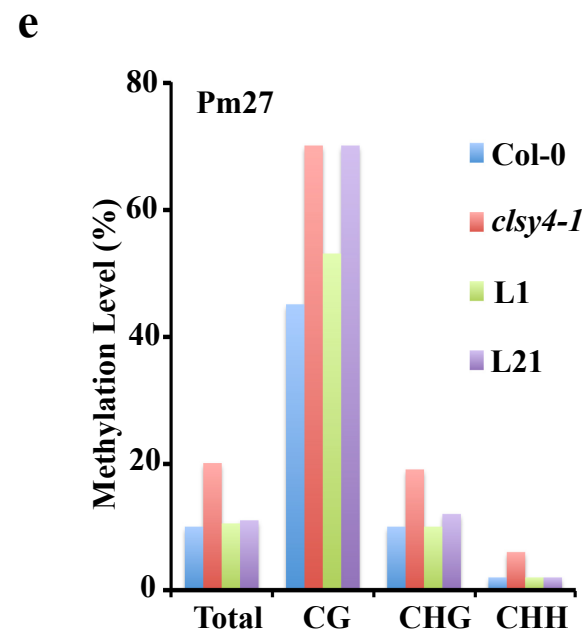

# Supplementary Figure 2

**a**

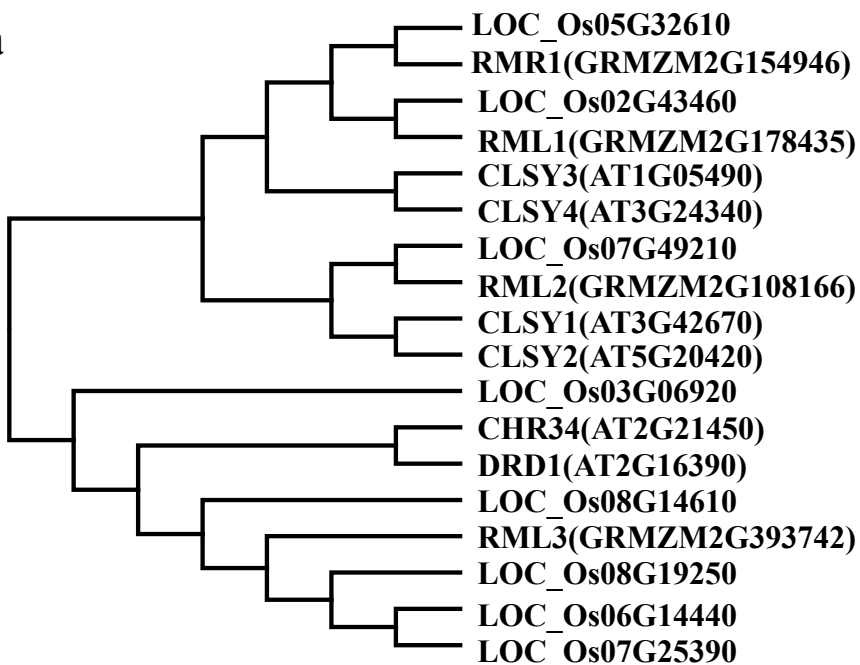

**b**

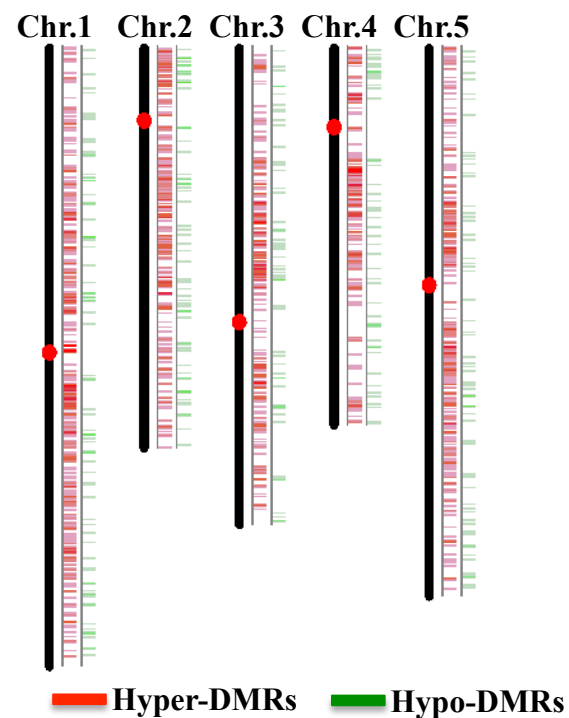

**c**

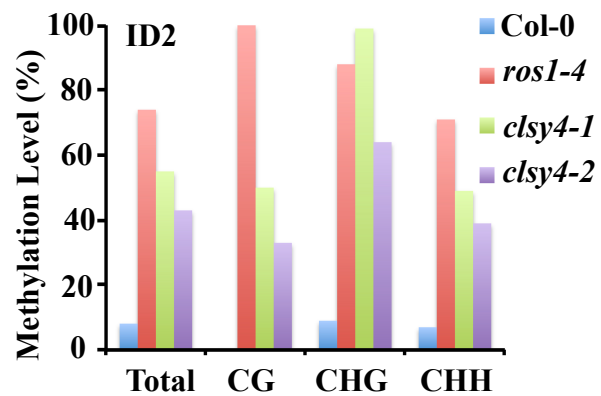

**d**

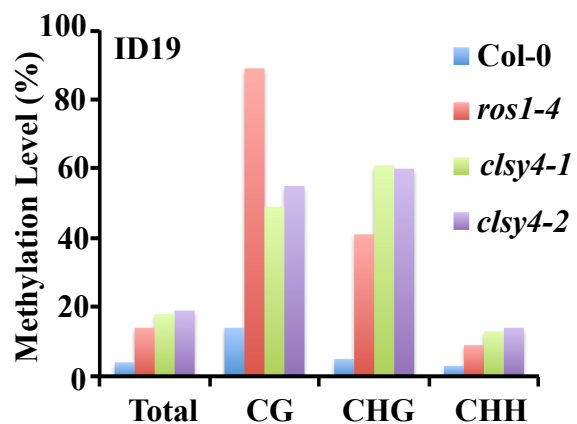

**e**

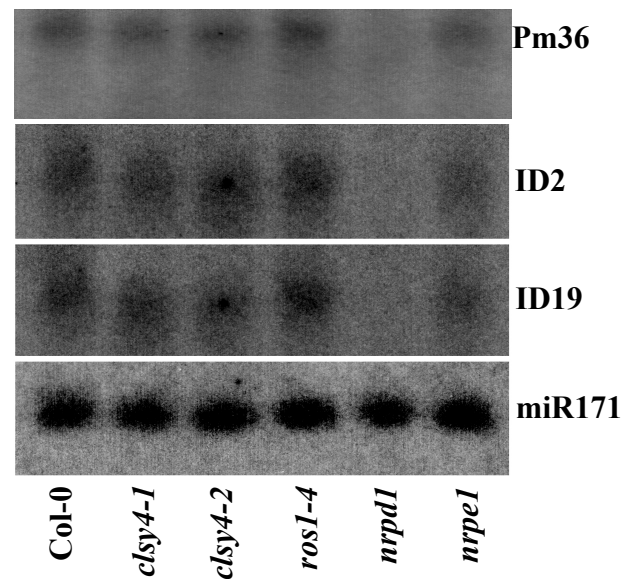

# Supplementary Figure 3

**a**

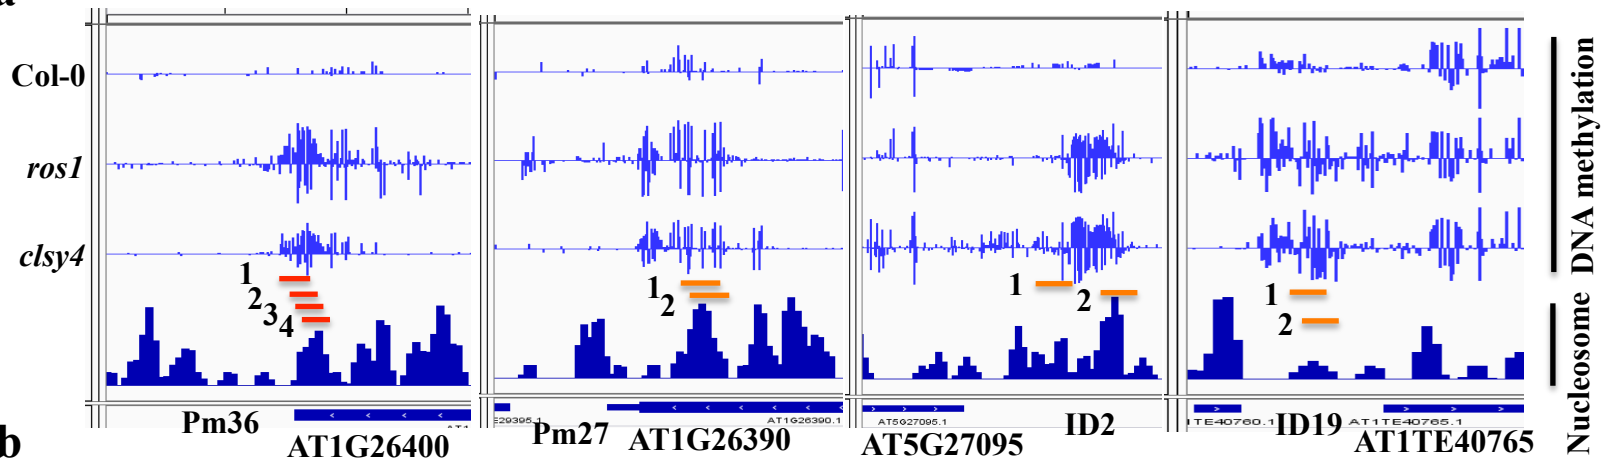

**b**

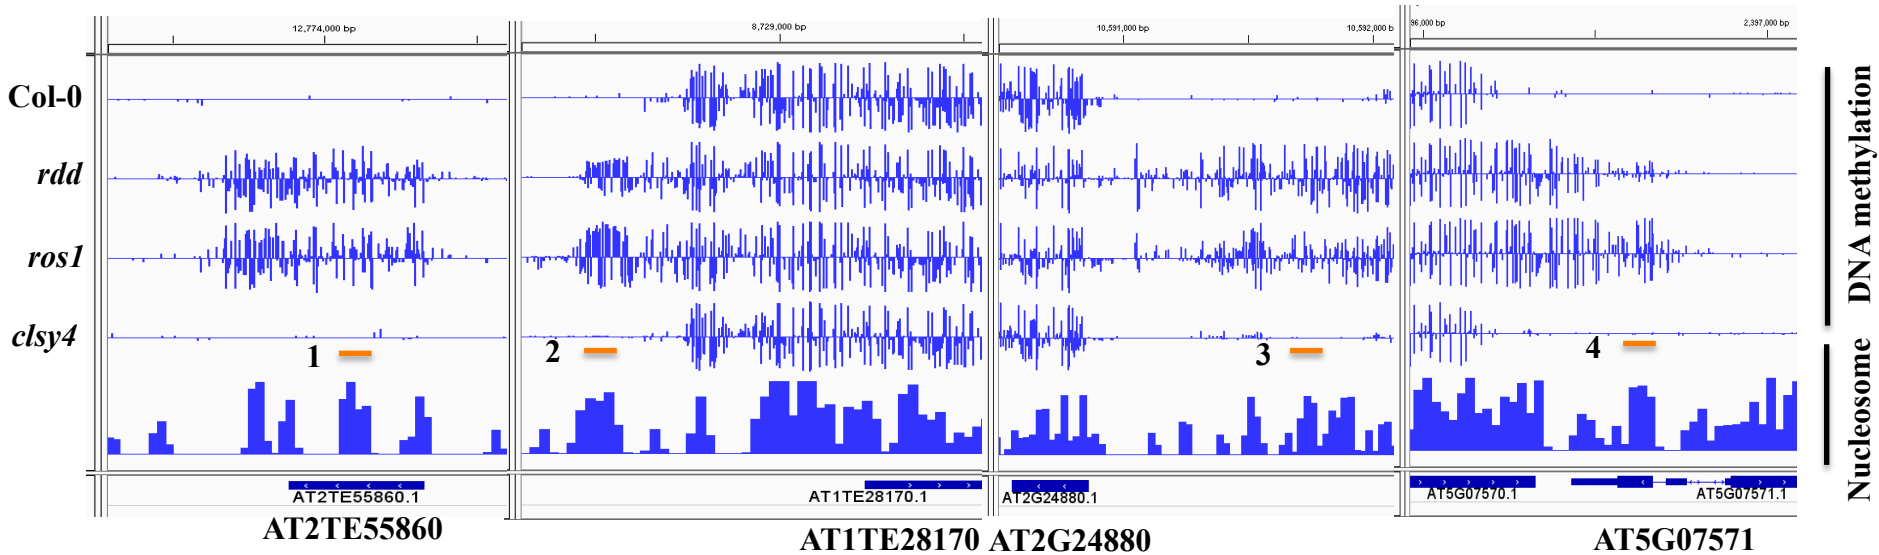

# Supplementary Figure 4

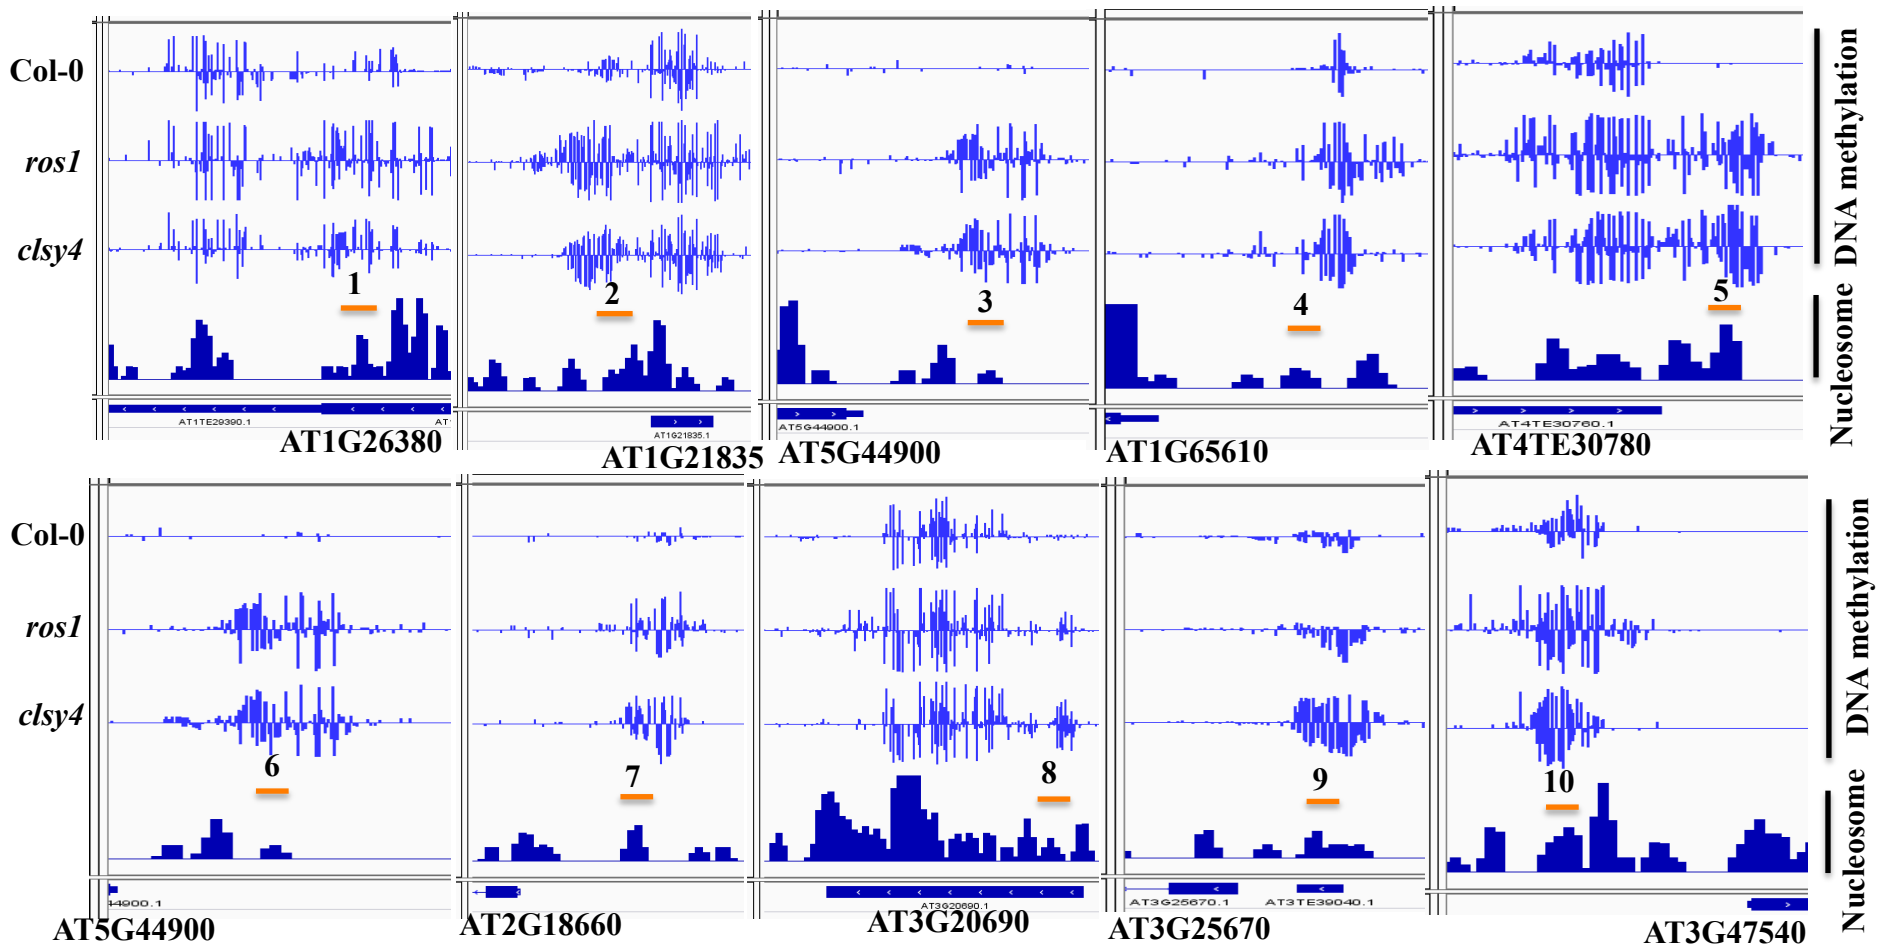

# Supplementary Figure 5

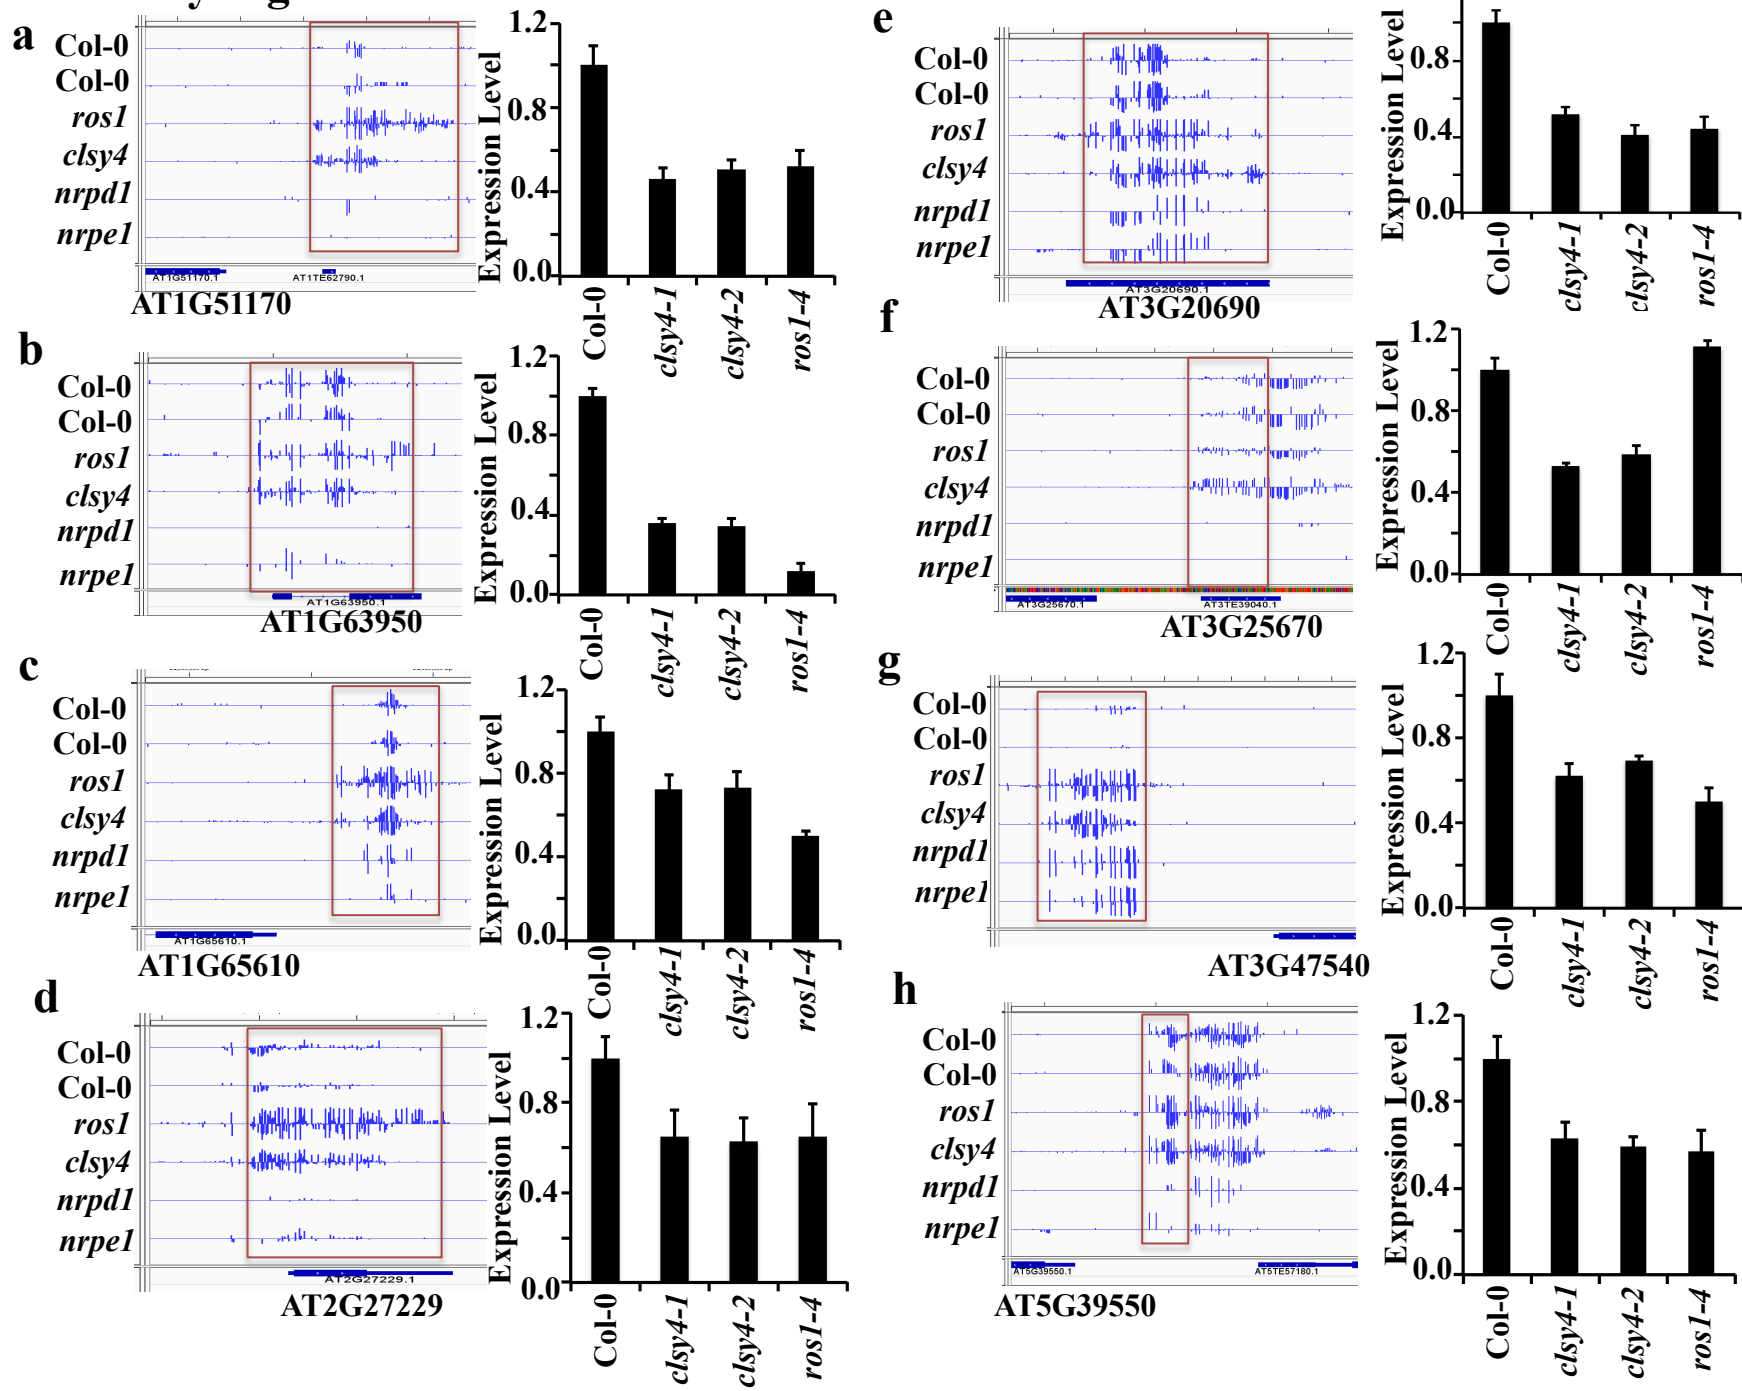

# Supplementary Figure 6

**a**

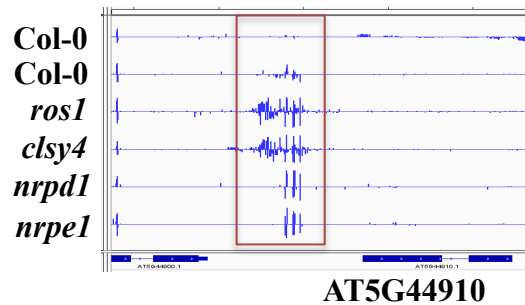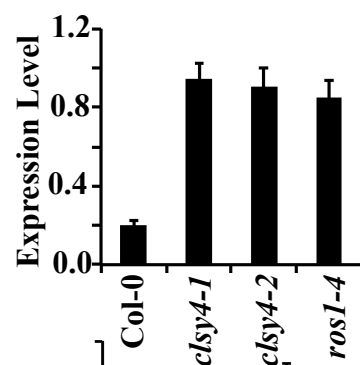

**b**

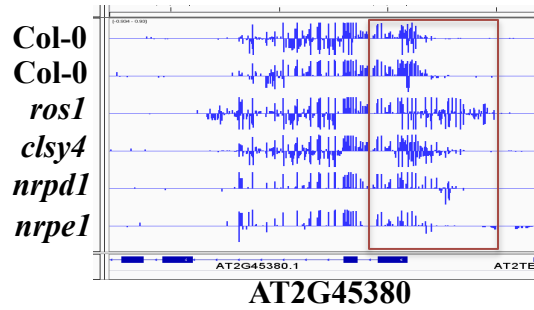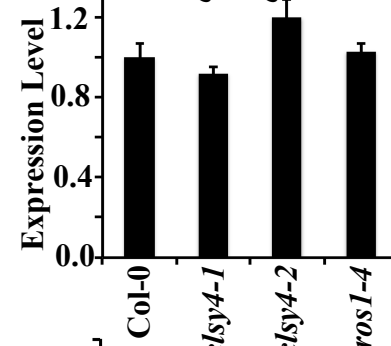

**c**

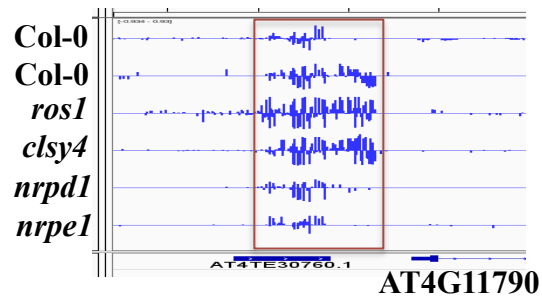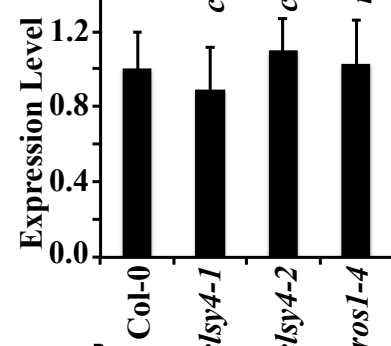

**d**

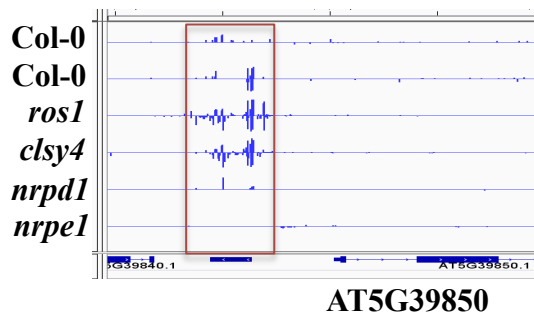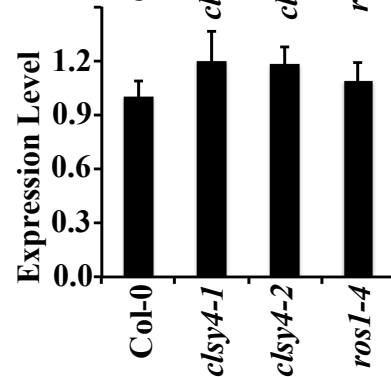

# Supplementary Figure 7

**a**

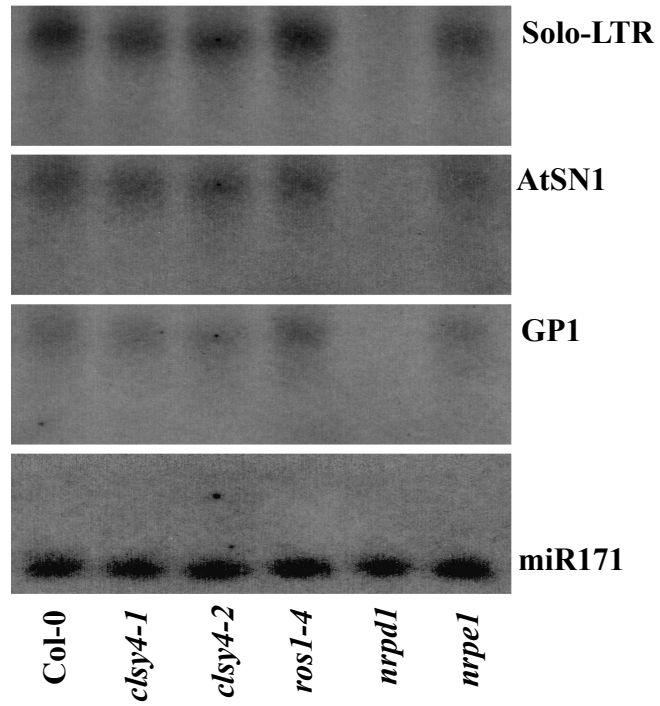

**b**

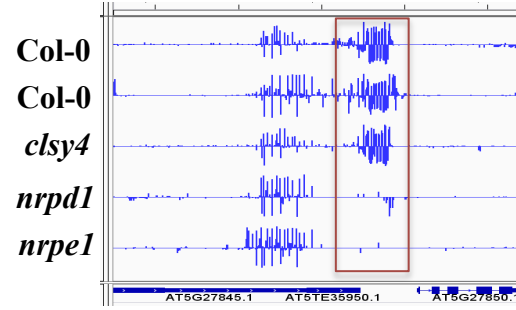

**c**

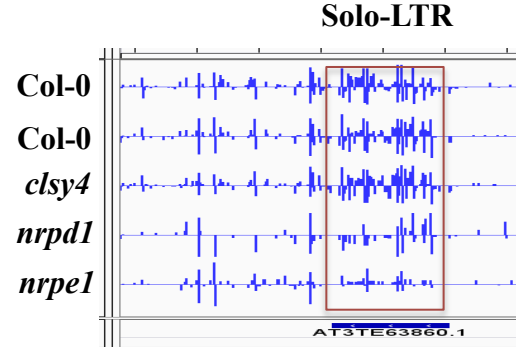

**d**

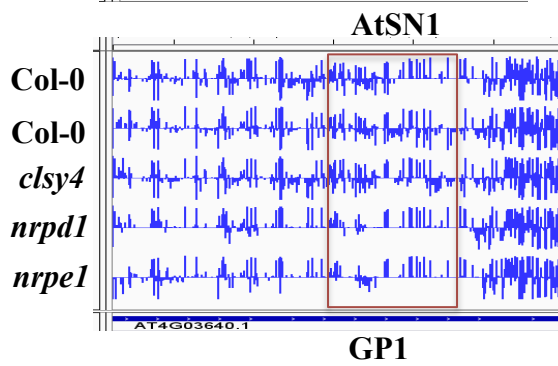

# Supplementary Figure 8

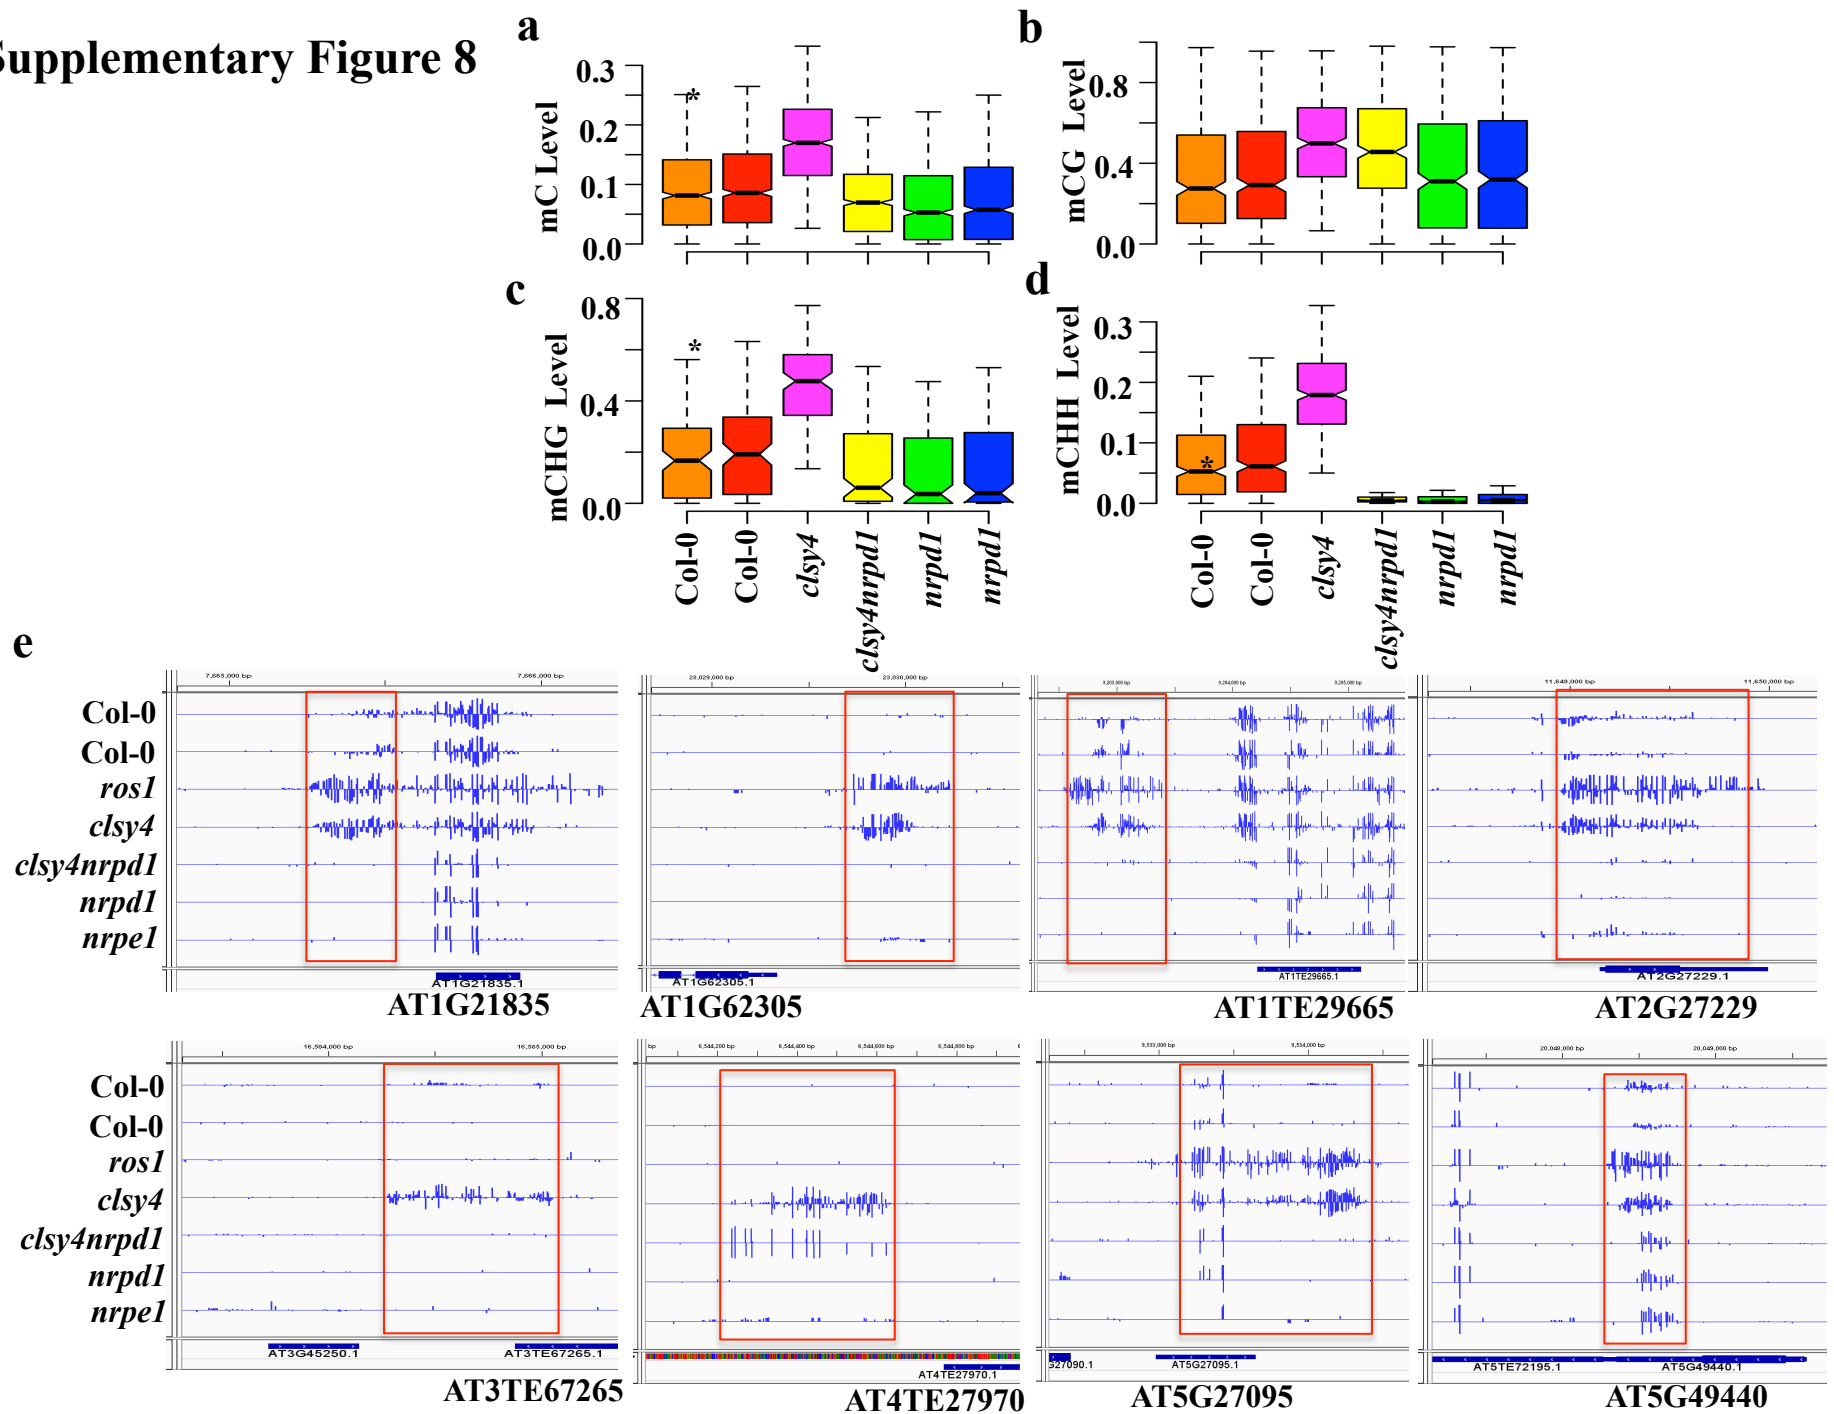



# Supplementary Figure 9

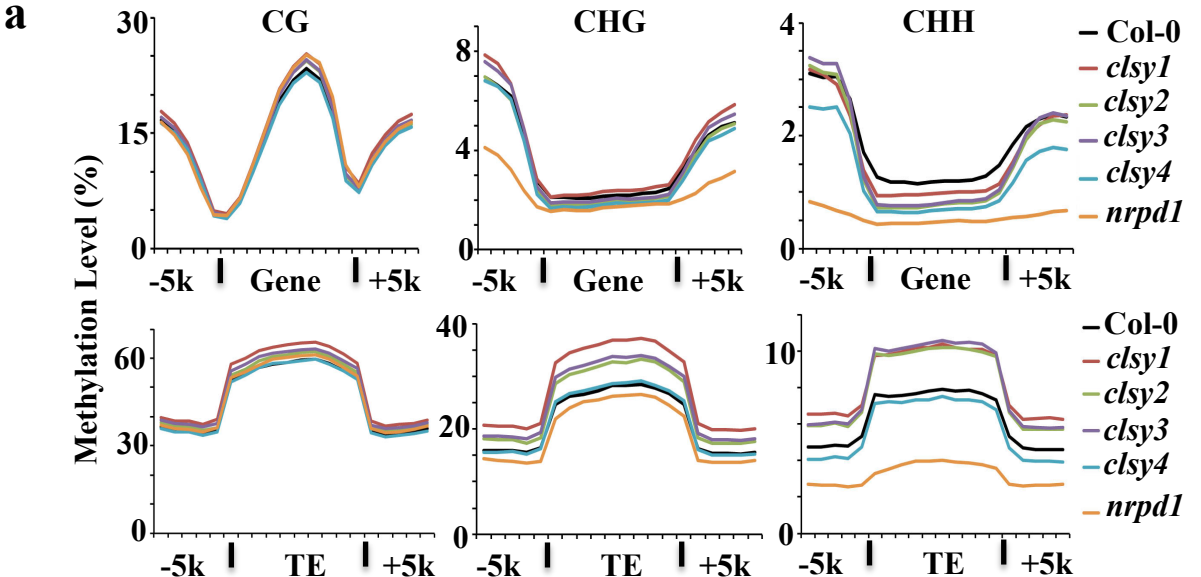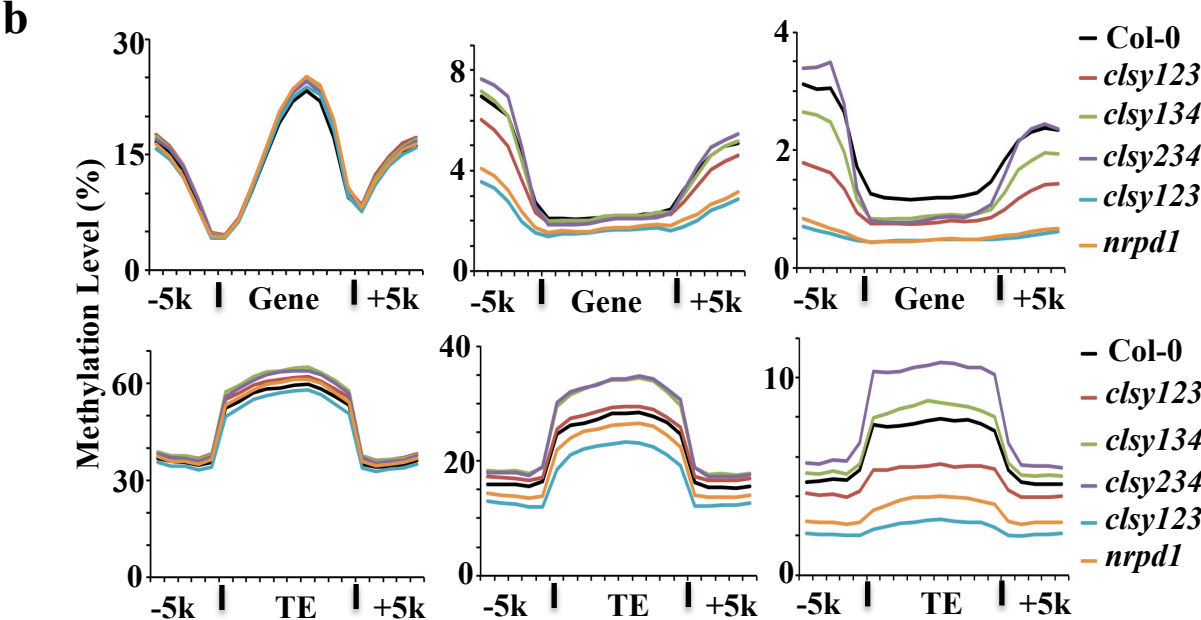

# Supplementary Figure 10

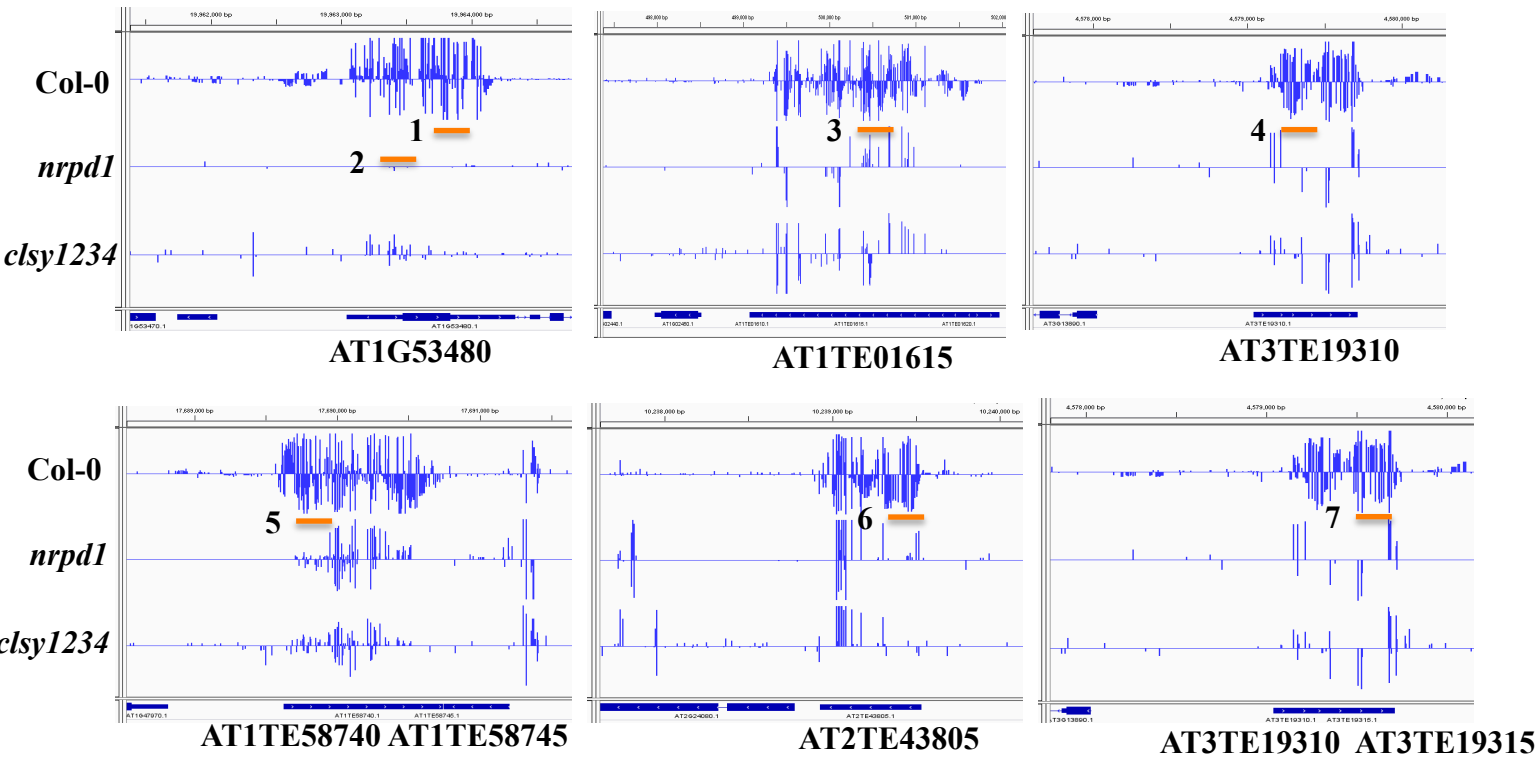

# Supplementary Figure 11

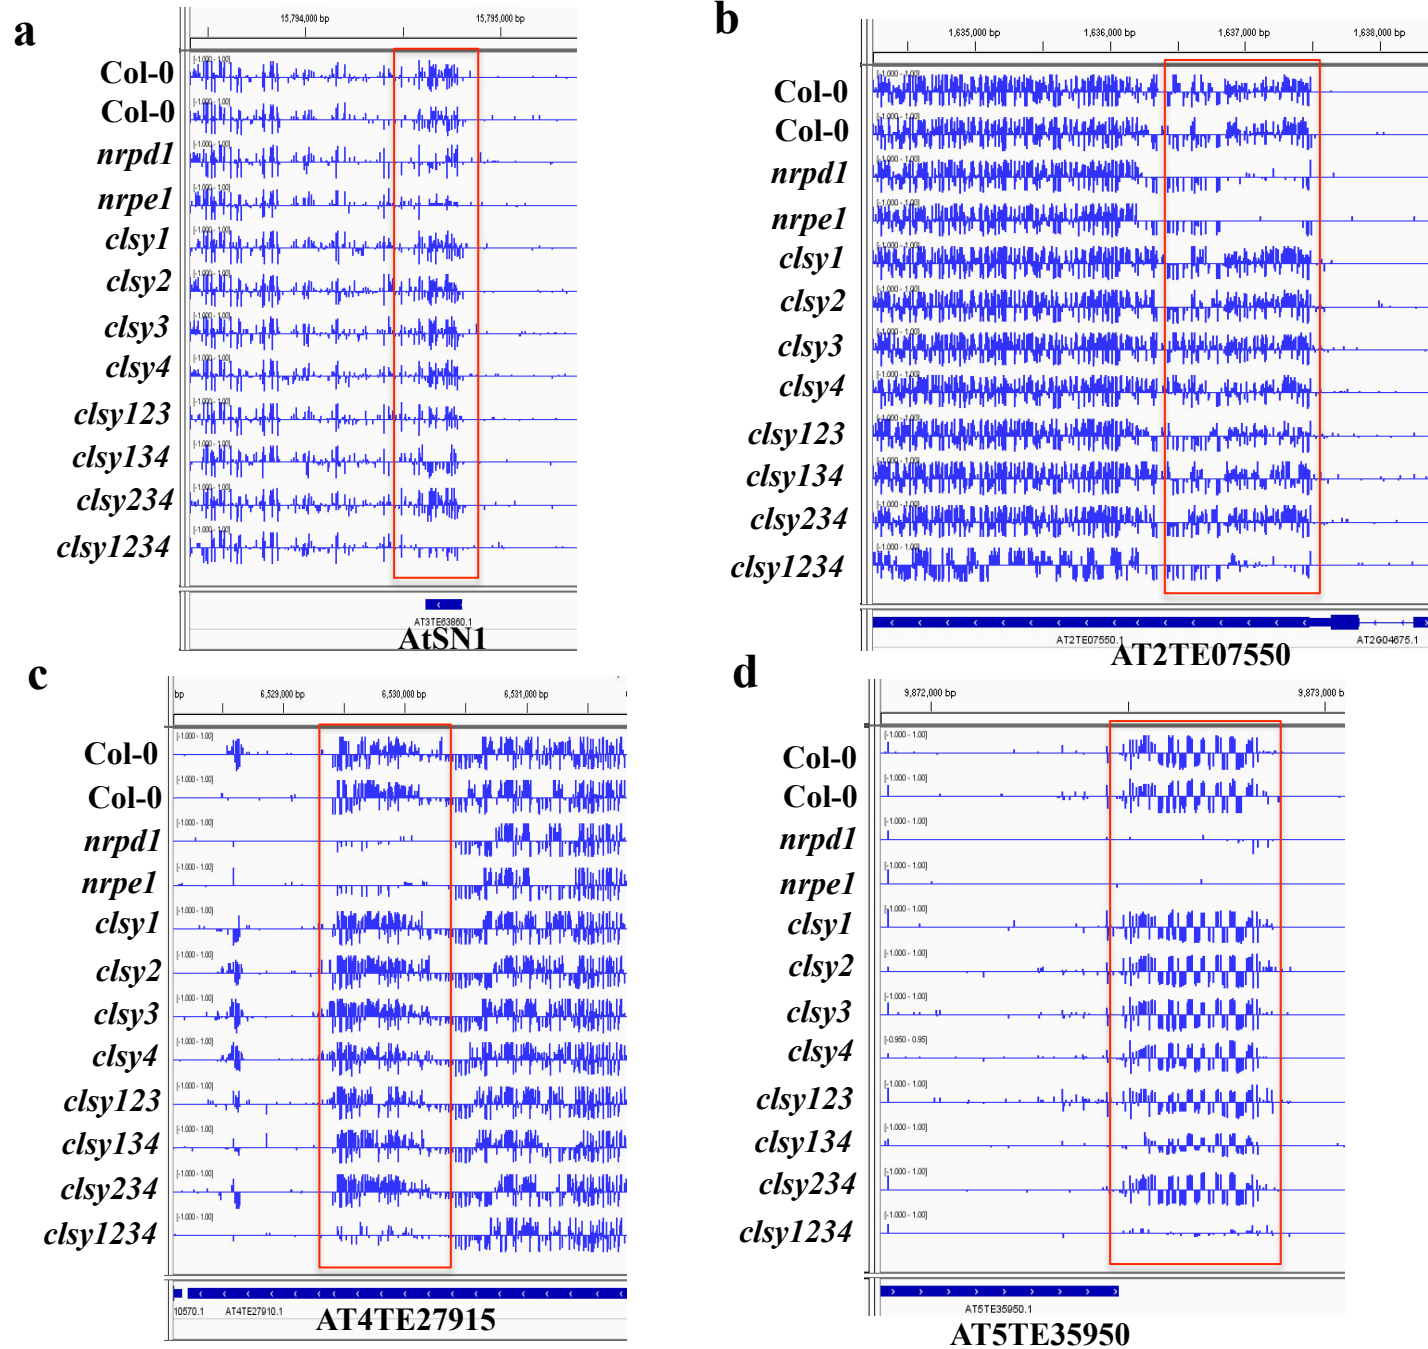

# Supplementary Figure 12

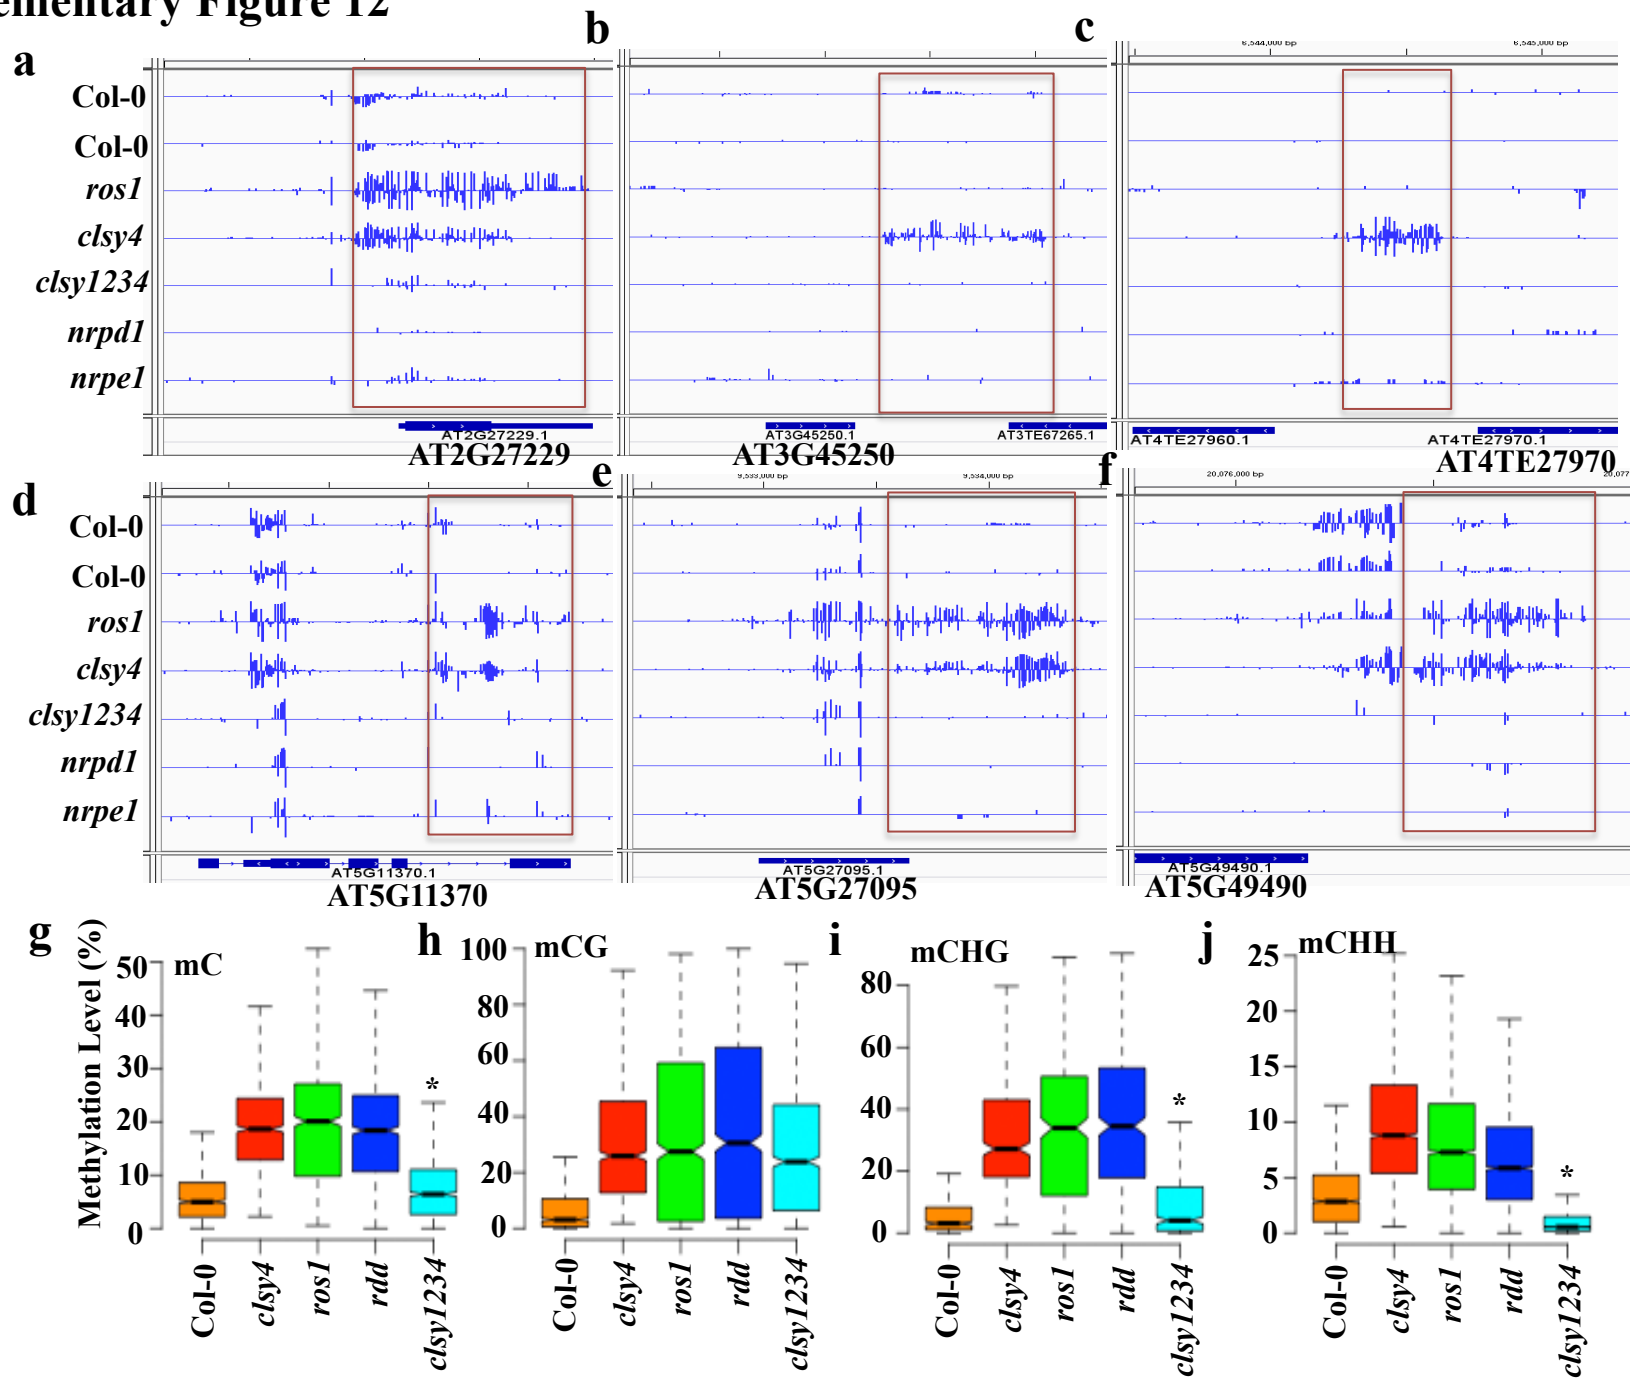

# Supplementary Figure 13

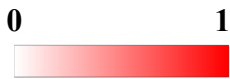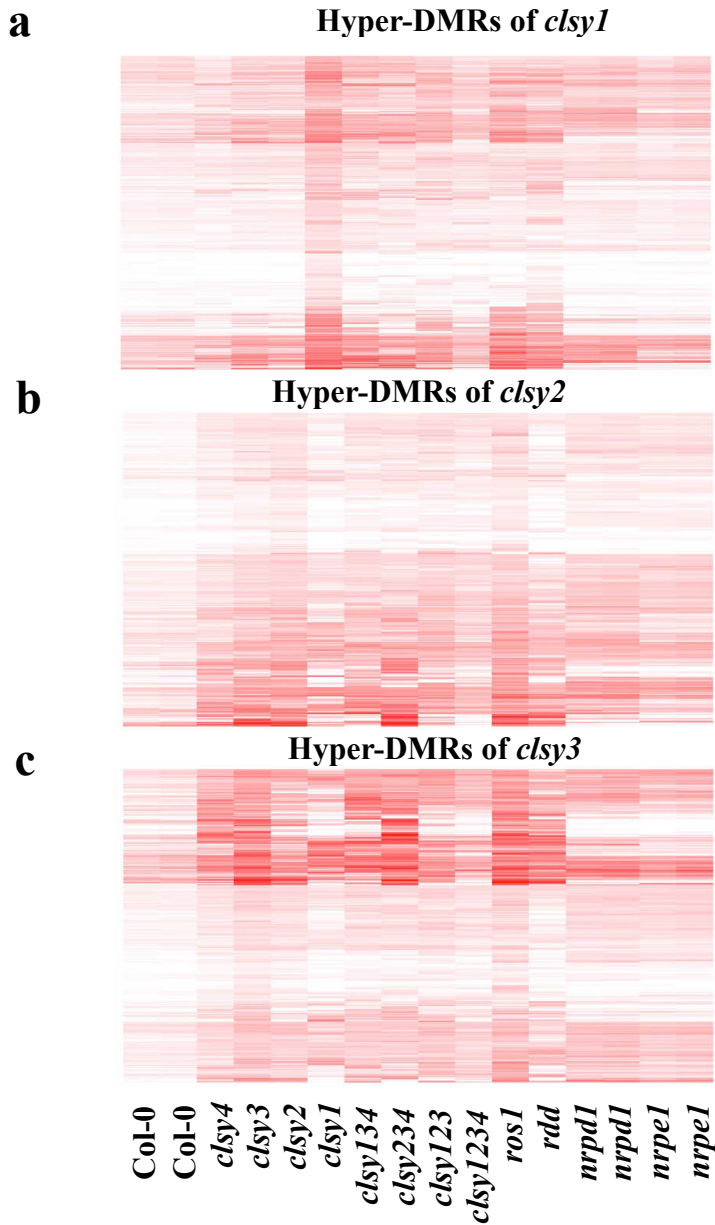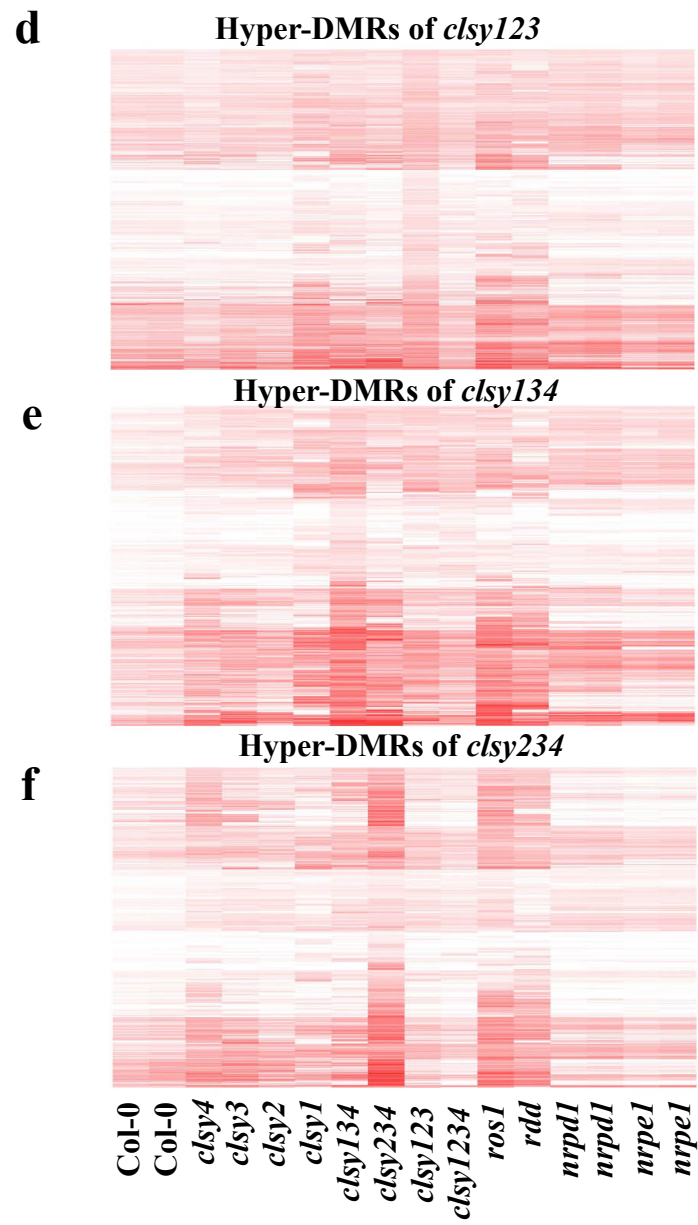

# Supplementary Figure 14

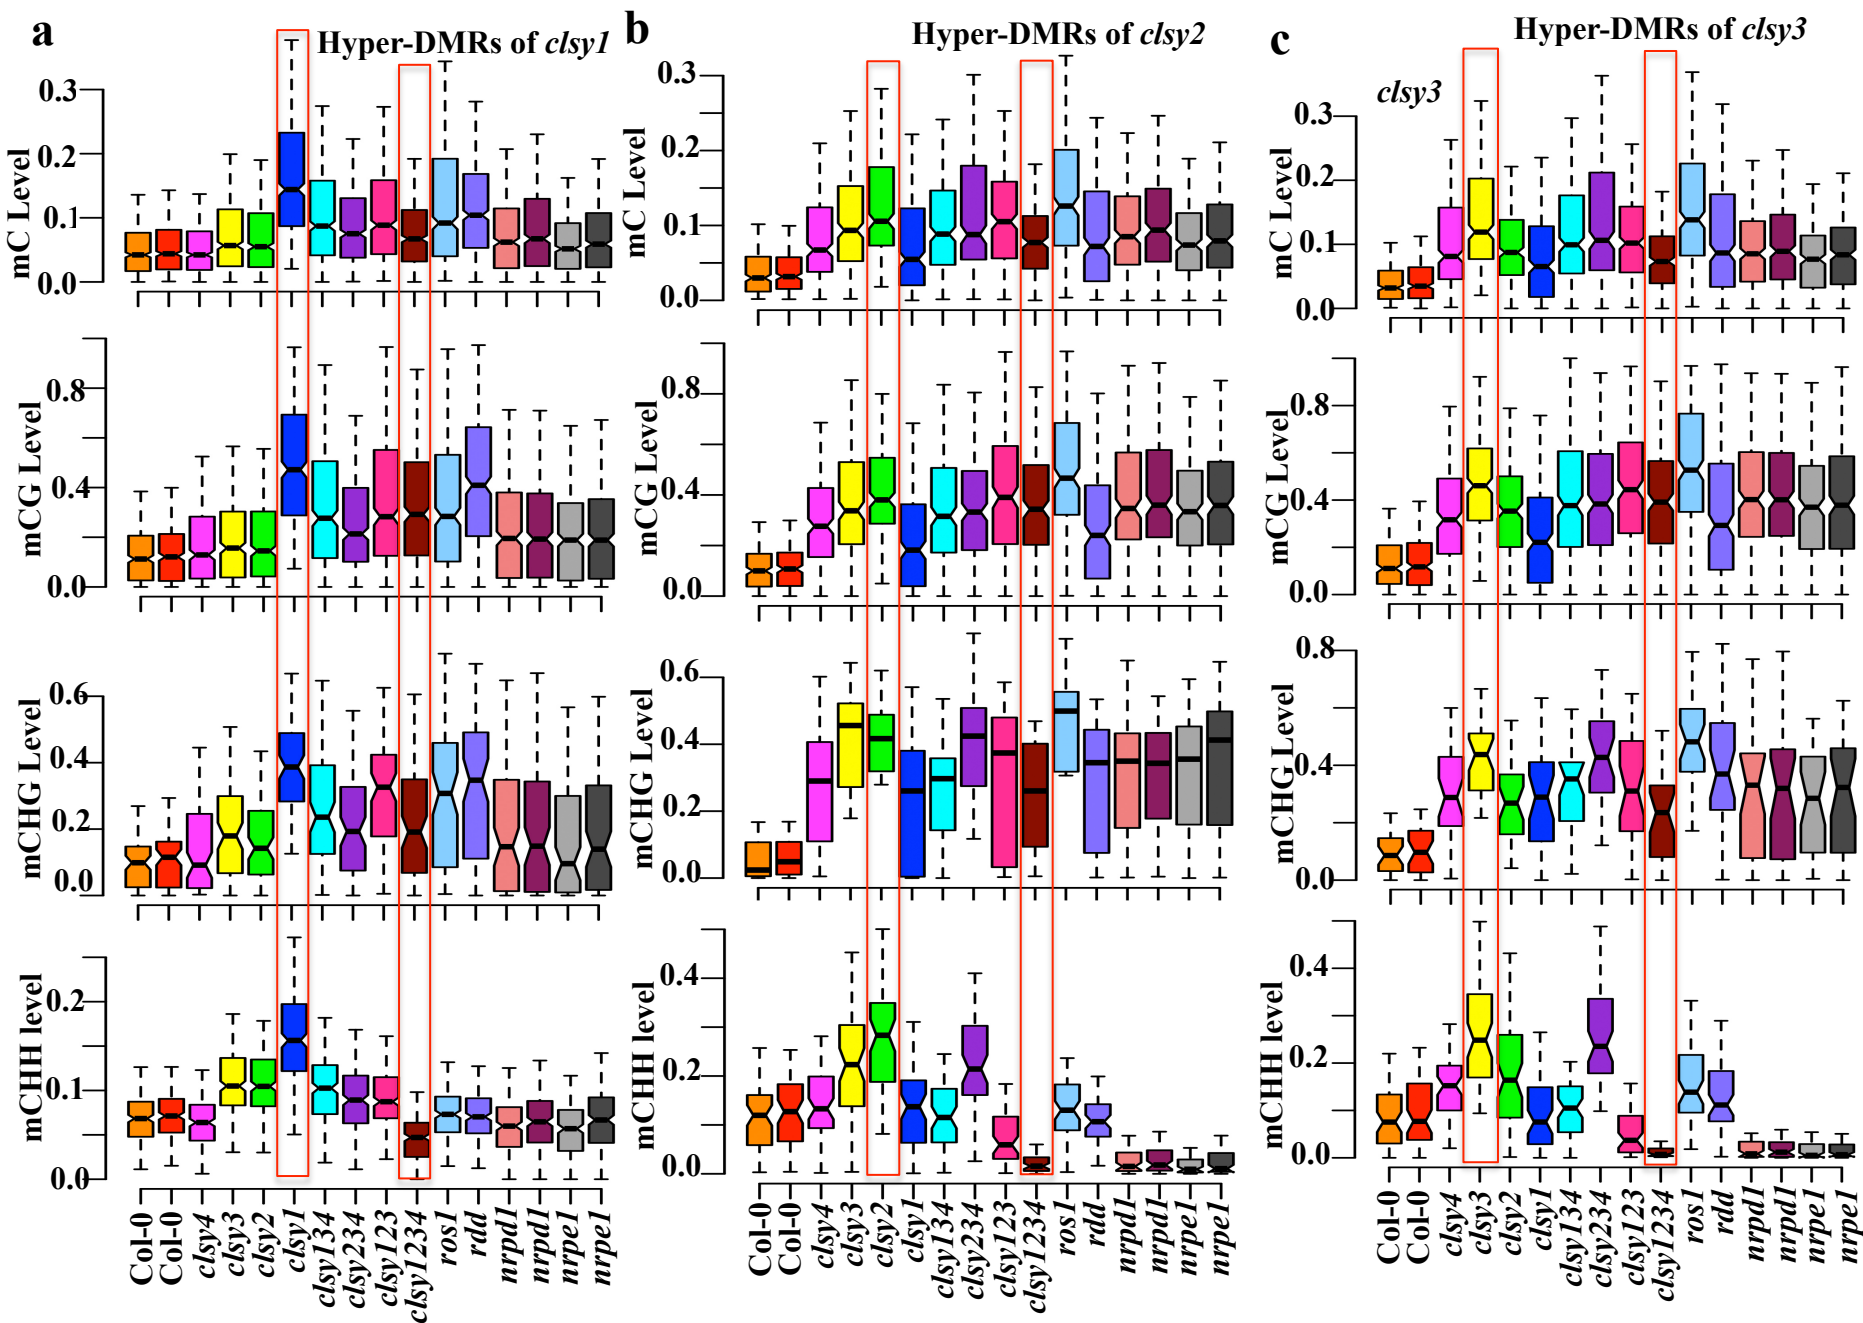

# Supplementary Figure 15

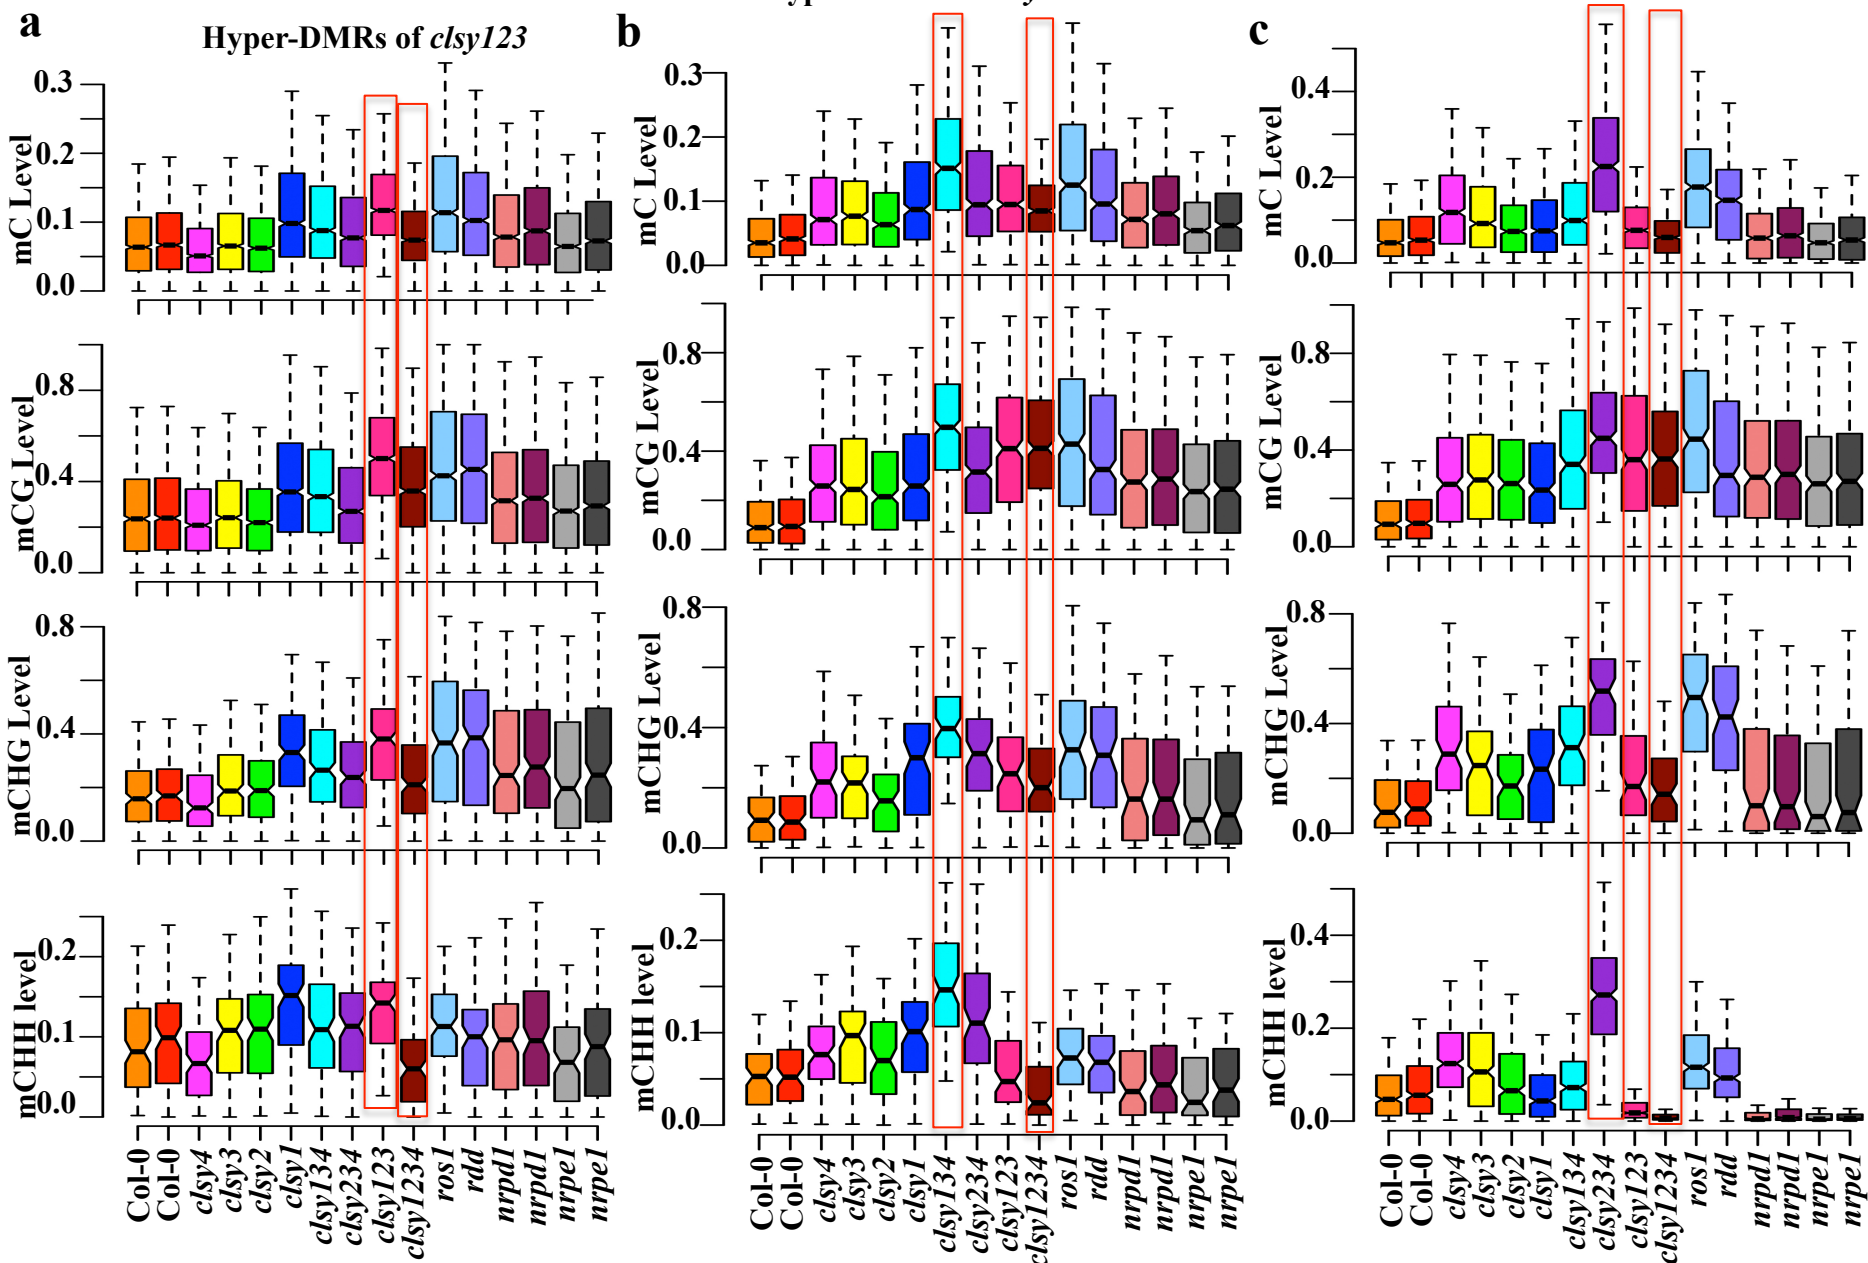

**Supplementary Figure 1. The mutation in *CLSY4* was responsible for DNA hypermethylation.**

(a) Integrated Genome Viewer display of the genomic location and DNA methylation level of the chop-PCR markers Pm36 and Pm27 in the indicated genotypes. The cytosine methylation levels at enzyme cutting sites are indicated by the IGV screenshots. (b) Schematic diagram showing the positions of two T-DNA insertions. (c) The *CLSY4* transcript levels in *clsy4* mutants as indicated by real-time PCR assay. (d) DNA methylation analysis of Pm36 in *clsy4* and complementation lines. (e) DNA methylation analysis of Pm27 in *clsy4* and complementation lines.

**Supplementary Figure 2. There was no increase in siRNA at *clsy4* hyper-DMRs.**

(a) The phylogenetic tree of plant-specific SNF2 proteins from Arabidopsis, rice, and maize generated by MEGA 5.2.2. (b) The distribution of DMRs of *clsy4* in the genome, with the red circle representing the centromere. (c) Individual locus bisulfite sequencing at a *clsy4* hyper-DMR, ID2. (d) Individual locus bisulfite sequencing at a *clsy4* hyper-DMR, ID19. (e) siRNA abundance at Pm36, ID2, and ID19 in *clsy4* and RdDM mutants measured by northern blotting.

**Supplementary Figure 3. DNA methylation levels and nucleosome positions of the regions tested in ChIP assays for nucleosome positioning.**

(a) Integrated Genome Viewer (IGV) display of the DNA methylation level in Col-0, *ros1-4*, and *clsy4-1*, and nucleosome position in Col-0<sup>37</sup>. The regions for ChIP-PCR are indicated by the orange lines. The identities of the common DMRs of *clsy4* and *rdd* are shown below each IGV snapshot. (b) Integrated Genome Viewer (IGV) display of the DNA methylation levels in Col-0, *rdd*, *ros1-4*, and *clsy4-1*, and nucleosome positioning in Col-0 at four *rdd*-specific hyper-DMRs.

**Supplementary Figure 4. DNA methylation levels and nucleosome positioning of 10 hyper-DMRs of *clsy4*.**

Integrated Genome Viewer (IGV) display of the DNA methylation levels in Col-0, *ros1-4*, and *clsy4-1*, and nucleosome positioning in Col-0<sup>37</sup>. The regions for ChIP-PCR are indicated by the orange lines.



**Supplementary Figure 5. Hyper-DMRs in the *clsy4* mutant repress nearby gene expression.**

(a-h) The IGV images on the left show the DNA methylation levels at hyper-DMRs in various genotypes, and IGV images on the right show the relative expression levels of nearby genes in the wild type *clsy4*, and *ros1*. Bars indicate the standard errors of three biological replicates.

**Supplementary Figure 6. Effect of hyper-DMRs on nearby gene expression.**

(a) A hyper-DMR in the *clsy4* mutant increases nearby gene expression. (b-d) Hyper-DMRs in the *clsy4* mutant have no substantial effect on nearby gene expression. Bars indicate the standard errors of three biological replicates.

**Supplementary Figure 7. The *clsy4* mutation does not affect siRNA abundance or DNA methylation level of several known RdDM loci.**

(a) Northern blotting showing the abundance of 24-nt siRNA at Solo-LTR, AtSN1, and GP1 (three RdDM target loci in the indicated genotypes). miR171 served as a loading control. (b-d) Snapshots showing the DNA methylation levels of Solo-LTR, AtSN1, and GP1 in *clsy4*, *nrdp1*, and *nrpe1* mutants.

**Supplementary Figure 8. DNA hypermethylation in *clsy4* depends on RdDM.**

(a-d) DNA methylation levels of C, CG, CHG, and CHH at *clsy4* hyper-DMRs in the indicated genotypes. \* indicates significant difference between *clsy4* and *clsy4nrdp1* ( $P < 0.01$ , Wilcoxon sum test). (e) Snapshots showing the DNA methylation of eight hyper-DMRs of *clsy4* in various genotypes.

**Supplementary Figure 9. Role of the CLSYs in regulating DNA methylation at genes and transposons.**

Methylation levels of CG, CHG, and CHH at genes and transposons and their flanking regions in (a) the *clsy* single mutant and in (b) the *clsy* triple and quadruple mutants. The wild type and *nrdp1* served as controls.

**Supplementary Figure 10. DNA methylation levels of hypo-DMRs of *clsy1234*.**

Integrated Genome Viewer (IGV) display of the DNA methylation levels in Col-0, *nrdp1*, and *clsy1234*. The regions for ChIP-PCR are indicated by the orange line.

**Supplementary Figure 11. The four CLSYs redundantly regulate DNA methylation at transposons.**

Snapshots showing the DNA methylation levels at RdDM-targeted transposons AtSN1 (a), AT2TE07550 (b), AT4TE27915 (c), and AT2TE07550 (d) in various *clsy* mutants.

**Supplementary Figure 12. DNA hypermethylation in *clsy4* depends on the other three CLSYs.**

(a-f) Snapshots showing the DNA methylation level of *clsy4* hyper-DMRs in the indicated genotypes. (g-j) Boxplots showing the DNA methylation of C, CG, CHG, and CHH at *clsy4* hyper-DMRs in the indicated genotypes. \* indicates significant difference between *clsy4* and *clsy1234* ( $P < 0.01$ , Wilcoxon sum test).

**Supplementary Figure 13. The four CLSYs antagonistically regulate DNA methylation and demethylation at the hyper-DMRs in individual *clsy* mutants.**

Total C methylation levels of various mutants at (a) *clsy1* hyper-DMRs, (b) *clsy2* hyper-DMRs, (c) *clsy3* hyper-DMRs, (d) *clsy123* hyper-DMRs, (e) *clsy134* hyper-DMRs, and (f) *clsy234* hyper-DMRs.

**Supplementary Figure 14. DNA hypermethylation of *clsy* single mutants depends on CLSYs.**

Boxplot showing the DNA methylation level of C, CG, CHG, and CHH at hyper-DMRs of (a) *clsy1*, (b) *clsy2*, and (c) *clsy3* in the indicated genotypes.

**Supplemental Figure 15. DNA hypermethylation of *clsy* triple mutants depends on CLSYs.**

Boxplot showing the DNA methylation level of C, CG, CHG, and CHH at hyper-DMRs of (a) *clsy123*, (b) *clsy134*, and (c) *clsy234* in the indicated genotypes.

| <b>Supplementary Table 1. T-DNA mutants for genetic screen</b> |                |                     |
|----------------------------------------------------------------|----------------|---------------------|
| <b>No.</b>                                                     | <b>Gene ID</b> | <b>T-DNA Number</b> |
| 1                                                              | AT5G04290      | SALK_001254         |
| 2                                                              | AT4G32700      | SALK_001669         |
| 3                                                              | AT5G44750      | SALK_005721         |
| 4                                                              | AT1G14790      | SALK_007638         |
| 5                                                              | AT5G45720      | SALK_007734         |
| 6                                                              | AT3G18090      | SALK_008535         |
| 7                                                              | AT2G34710      | SALK_008924         |
| 8                                                              | AT4G19550      | SALK_008553         |
| 9                                                              | AT2G25170      | SALK_010693         |
| 10                                                             | AT2G01280      | SALK_011937         |
| 11                                                             | AT4G24660      | SALK_017963         |
| 12                                                             | AT4G29090      | SALK_023866         |
| 13                                                             | AT5G13240      | SALK_026637         |
| 14                                                             | AT1G08540      | SALK_045706         |
| 15                                                             | AT2G02090      | SALK_054130         |
| 16                                                             | AT4G17460      | SALK_059835         |
| 17                                                             | AT5G20420      | SALK_061962         |
| 18                                                             | AT2G04630      | SALK_064868         |
| 19                                                             | AT1G10520      | SALK_075391         |
| 20                                                             | AT5G13730      | SALK_078760         |
| 21                                                             | AT1G03280      | SALK_081307         |
| 22                                                             | AT3G28920      | SALK_085482         |
| 23                                                             | AT2G19920      | SALK_088175         |
| 24                                                             | AT1G60620      | SALK_088247         |
| 25                                                             | AT4G24790      | SALK_092209         |
| 26                                                             | AT5G42780      | SALK_092897         |
| 27                                                             | AT3G24340      | SALK_102252         |
| 28                                                             | AT5G09380      | SALK_113934         |
| 29                                                             | AT4G31900      | SALK_115303         |
| 30                                                             | AT4G25180      | SALK_125873         |
| 31                                                             | AT4G08350      | SALK_126891         |
| 32                                                             | AT5G18620      | SALK_128524         |
| 33                                                             | AT1G08060      | SALK_131757         |
| 34                                                             | AT1G63160      | SALK_127244         |
| 35                                                             | AT5G22010      | SALK_140231         |
| 36                                                             | AT1G13870      | SALK_140551         |
| 37                                                             | AT3G54490      | SALK_148046         |
| 38                                                             | AT3G19670      | SALK_151254         |
| 39                                                             | AT4G32040      | SALK_000339         |
| 40                                                             | AT5G63950      | SALK_007071         |

|    |           |             |
|----|-----------|-------------|
| 41 | AT5G65410 | SALK_014023 |
| 42 | AT3G60390 | SALK_014055 |
| 43 | AT4G31900 | SALK_014672 |
| 44 | AT4G21710 | SALK_015933 |
| 45 | AT2G46020 | SALK_030046 |
| 46 | AT1G79840 | SALK_039825 |
| 47 | AT1G67120 | SALK_057010 |
| 48 | AT5G65310 | SALK_058055 |
| 49 | AT2G21450 | SALK_059100 |
| 50 | AT2G34320 | SALK_059700 |
| 51 | AT1G67630 | SALK_064094 |
| 52 | AT1G63210 | SALK_086163 |
| 53 | AT5G44800 | SALK_089483 |
| 54 | AT1G14790 | SALK_112300 |
| 55 | AT1G63020 | SALK_143437 |
| 56 | AT5G04290 | SALK_001254 |
| 57 | AT3G18520 | SALK_004027 |
| 58 | AT1G79350 | SALK_004087 |
| 59 | AT5G44750 | SALK_005721 |
| 60 | AT5G25060 | SALK_011832 |
| 61 | AT3G06290 | SALK_013326 |
| 62 | AT1G63490 | SALK_014109 |
| 63 | AT4G21710 | SALK_015933 |
| 64 | AT5G26610 | SALK_018458 |
| 65 | AT2G13370 | SALK_020296 |
| 66 | AT5G45190 | SALK_021004 |
| 67 | AT5G24740 | SALK_021356 |
| 68 | AT1G34360 | SALK_022422 |
| 69 | AT3G45830 | SALK_024862 |
| 70 | AT4G31880 | SALK_024683 |
| 71 | AT4G39450 | SALK_026025 |
| 72 | AT2G17410 | SALK_026835 |
| 73 | AT1G02080 | SALK_030822 |
| 74 | AT5G12400 | SALK_031040 |
| 75 | AT4G32620 | SALK_039205 |
| 76 | AT3G01460 | SALK_039302 |
| 77 | AT1G09730 | SALK_040576 |
| 78 | AT1G79090 | SALK_040660 |
| 79 | AT4G29790 | SALK_042026 |
| 80 | AT2G44900 | SALK_043325 |
| 81 | AT1G55040 | SALK_043472 |
| 82 | AT5G46190 | SALK_051182 |

|     |           |             |
|-----|-----------|-------------|
| 83  | AT1G76320 | SALK_045754 |
| 84  | AT1G26830 | SALK_050756 |
| 85  | AT1G51520 | SALK_053222 |
| 86  | AT2G19390 | SALK_055660 |
| 87  | AT3G17740 | SALK_055926 |
| 88  | AT3G22170 | SALK_059264 |
| 89  | AT2G27100 | SALK_059424 |
| 90  | AT3G06940 | SALK_060069 |
| 91  | AT3G56850 | SALK_061079 |
| 92  | AT5G58470 | SALK_061974 |
| 93  | AT5G13590 | SALK_062434 |
| 94  | AT3G26400 | SALK_064531 |
| 95  | AT4G36960 | SALK_068296 |
| 96  | AT1G79730 | SALK_070632 |
| 97  | AT5G04240 | SALK_074694 |
| 98  | AT3G10650 | SALK_076476 |
| 99  | AT4G31430 | SALK_076754 |
| 100 | AT5G08220 | SALK_077881 |
| 101 | AT1G80010 | SALK_077996 |
| 102 | AT3G62240 | SALK_079716 |
| 103 | AT2G30470 | SALK_088606 |
| 104 | AT1G13190 | SALK_090357 |
| 105 | AT1G50620 | SALK_094181 |
| 106 | AT1G28420 | SALK_099250 |
| 107 | AT2G47960 | SALK_100372 |
| 108 | AT5G06120 | SALK_100541 |
| 109 | AT1G23860 | SALK_100950 |
| 110 | AT3G09880 | SALK_103167 |
| 111 | AT1G18950 | SALK_104865 |
| 112 | AT3G09360 | SALK_108656 |
| 113 | AT3G04560 | SALK_110145 |
| 114 | AT5G10940 | SALK_113565 |
| 115 | AT5G11530 | SALK_114383 |
| 116 | AT3G07660 | SALK_116148 |
| 117 | AT1G15940 | SALK_116162 |
| 118 | AT2G30800 | SALK_117852 |
| 119 | AT5G09880 | SALK_121246 |
| 120 | AT1G55970 | SALK_121407 |
| 121 | AT2G44950 | SALK_122512 |
| 122 | AT1G80810 | SALK_133849 |
| 123 | AT5G42950 | SALK_135013 |
| 124 | AT5G57360 | SALK_135207 |

|     |           |             |
|-----|-----------|-------------|
| 125 | AT1G48620 | SALK_141611 |
| 126 | AT1G03060 | SALK_148574 |
| 127 | AT3G19670 | SALK_151254 |
| 128 | AT3G20540 | SALK_134274 |
| 129 | AT1G73805 | SALK_138476 |
| 130 | AT1G22130 | SALK_066443 |
| 131 | AT3G23780 | SALK_109513 |
| 132 | AT3G47830 | SALK_119297 |
| 133 | AT5G14920 | SALK_054982 |
| 134 | AT2G38560 | SALK_027259 |
| 135 | AT2G15400 | SALK_099705 |
| 136 | AT5G19910 | SALK_035522 |
| 137 | AT3G13240 | SALK_037693 |
| 138 | AT4G16780 | SALK_106790 |
| 139 | AT2G40030 | SALK_029919 |
| 140 | AT4G30860 | SALK_128444 |
| 141 | AT2G02520 | SALK_059227 |
| 142 | AT2G28290 | SALK_110320 |
| 143 | AT5G48850 | SALK_099766 |
| 144 | AT3G44570 | SALK_043100 |
| 145 | AT1G67500 | SALK_067237 |
| 146 | AT1G64860 | SALK_147985 |
| 147 | AT5G09790 | SALK_130607 |
| 148 | AT2G41340 | SALK_134107 |
| 149 | AT3G07340 | SALK_091124 |
| 150 | AT3G11220 | SALK_079193 |
| 151 | AT5G03740 | SALK_129799 |
| 152 | AT2G24120 | SALK_093884 |
| 153 | AT5G42765 | SALK_149886 |
| 154 | AT3G10010 | SALK_131712 |
| 155 | AT1G49980 | SALK_081715 |
| 156 | AT5G46920 | SALK_064659 |
| 157 | AT4G02020 | SALK_109121 |
| 158 | AT1G63160 | SALK_042804 |
| 159 | AT3G15080 | SALK_024707 |
| 160 | AT2G36610 | SALK_083053 |
| 161 | AT4G21010 | SALK_151548 |
| 162 | AT1G54250 | SALK_151800 |
| 163 | AT2G27120 | SALK_025607 |
| 164 | AT2G44980 | SALK_095969 |
| 165 | AT2G33690 | SALK_018685 |
| 166 | AT3G53920 | SALK_009166 |

|     |           |              |
|-----|-----------|--------------|
| 167 | AT2G31450 | SALK_054181  |
| 168 | AT5G40310 | SALK_068417  |
| 169 | AT1G05900 | SALK_013055  |
| 170 | AT3G09360 | SALK_071454  |
| 171 | AT4G18820 | SALK_102798  |
| 172 | AT2G32160 | SALK_118137  |
| 173 | AT2G19910 | SALK_036925  |
| 174 | AT1G30590 | SALK_146255  |
| 175 | AT4G22390 | SALK_136090  |
| 176 | AT5G25220 | SALK_136464  |
| 177 | AT5G26040 | SALK_041074  |
| 178 | AT3G63030 | SALK_042834  |
| 179 | AT1G18835 | SALK_009428  |
| 180 | AT5G11060 | SALK_020216  |
| 181 | AT1G67120 | SALK_057010  |
| 182 | AT3G16980 | SALK_032670  |
| 183 | AT3G19670 | SALK_066044C |
| 184 | AT3G19670 | SALK_043590C |
| 185 | AT4G38710 | SALK_062327C |
| 186 | AT1G11475 | SALK_146725C |
| 187 | AT5G42950 | SALK_059333C |
| 188 | AT1G14790 | SALK_007638C |
| 189 | AT1G52520 | SALK_019743C |
| 190 | AT2G17410 | SALK_104394C |
| 191 | AT4G33620 | SALK_090744C |
| 192 | AT4G33620 | SALK_023493C |
| 193 | AT1G09730 | SALK_080083C |
| 194 | AT3G24340 | SALK_003876C |
| 195 | AT4G25180 | SALK_073697  |
| 196 | AT5G13730 | SALK_027838C |
| 197 | AT4G25180 | CS828668     |
| 198 | AT1G09730 | SALK_022079  |
| 199 | AT1G80010 | SALK_122261  |
| 200 | AT1G14790 | CS66077      |
| 201 | AT4G33620 | SALK_044756  |
| 202 | AT5G24740 | SALK_142760  |
| 203 | AT2G04630 | SALK_021069  |
| 204 | AT5G12400 | SALK_134905  |
| 205 | AT1G55040 | CS825466     |
| 206 | AT1G55040 | CS811560     |
| 207 | AT2G17410 | SALK_026835  |
| 209 | AT4G19610 | SALK_149991  |

|     |           |             |
|-----|-----------|-------------|
| 208 | AT1G16610 | SALK_123442 |
| 210 | AT5G41190 | SALK_021098 |
| 211 | AT2G30800 | SALK_043338 |
| 212 | AT5G20600 | SALK_073773 |
| 213 | AT1G56290 | SALK_104857 |
| 214 | AT3G43240 | SALK_111627 |
| 215 | AT3G29090 | SALK_074820 |
| 216 | AT3G06930 | SALK_097442 |
| 217 | AT4G38440 | SALK_099872 |
| 218 | AT1G15700 | SALK_062789 |
| 219 | AT2G34040 | SALK_008073 |
| 220 | AT2G39810 | SALK_052108 |
| 221 | AT3G42790 | SALK_080056 |
| 222 | AT3G12130 | SALK_057095 |
| 223 | AT5G49020 | SALK_033423 |
| 224 | AT4G20400 | SALK_135712 |
| 225 | AT4G00090 | SALK_085277 |
| 226 | AT4G14000 | SALK_094629 |
| 227 | AT1G24706 | SALK_072011 |
| 228 | AT1G60850 | SALK_088247 |
| 229 | AT2G38770 | SALK_041627 |
| 230 | AT5G64730 | SALK_126634 |
| 231 | AT5G51130 | SALK_100446 |
| 232 | AT3G63400 | SALK_094094 |
| 233 | AT5G20510 | SALK_075676 |
| 234 | AT5G05680 | SALK_085349 |
| 235 | AT1G06230 | SALK_113292 |
| 236 | AT2G34900 | SALK_103499 |
| 237 | AT4G21100 | SALK_061944 |
| 238 | AT5G14520 | SALK_026359 |
| 239 | AT1G73840 | SALK_078793 |
| 240 | AT1G79280 | SALK_011827 |
| 241 | AT2G33730 | SALK_110742 |
| 242 | AT2G24500 | SALK_008119 |
| 243 | AT5G06460 | SALK_108047 |
| 244 | AT5G15810 | SALK_132252 |
| 245 | AT4G16570 | SALK_085829 |
| 246 | AT5G51300 | SALK_062177 |
| 247 | AT2G41020 | SALK_073780 |
| 248 | AT4G24880 | SALK_119615 |
| 249 | AT5G62190 | SALK_016729 |
| 250 | AT5G03450 | SALK_049477 |



|     |           |             |
|-----|-----------|-------------|
| 251 | AT1G11240 | SALK_104924 |
| 252 | AT1G03910 | SALK_003714 |
| 253 | AT5G13850 | SALK_092796 |
| 254 | AT5G58410 | SALK_098351 |
| 255 | AT3G51270 | SALK_130093 |
| 256 | AT5G42950 | SALK_005994 |
| 257 | AT2G17510 | SALK_037533 |
| 258 | AT1G14300 | SALK_152562 |
| 259 | AT1G71350 | SALK_102168 |
| 260 | AT5G64200 | SALK_124563 |
| 261 | AT4G31120 | SALK_073624 |
| 262 | AT5G06210 | SALK_043816 |
| 263 | AT5G12120 | SALK_109895 |
| 264 | AT5G47750 | SALK_093225 |
| 265 | AT4G02820 | SALK_082825 |
| 266 | AT2G38420 | SALK_113273 |
| 267 | AT5G20200 | SALK_024526 |
| 268 | AT5G47680 | SALK_087697 |
| 269 | AT2G25670 | SALK_014065 |
| 270 | AT3G12340 | SALK_130890 |
| 271 | AT2G40360 | SALK_075405 |
| 272 | AT1G07360 | SALK_142085 |
| 273 | AT1G50380 | SALK_027789 |
| 274 | AT3G20020 | SALK_024873 |
| 275 | AT5G53770 | SALK_090264 |
| 276 | AT1G48560 | SALK_008422 |

| <b>Supplementary Table 2. Bs-sequencing basic information</b> |                        |                    |                    |               |              |                 |                     |                     |
|---------------------------------------------------------------|------------------------|--------------------|--------------------|---------------|--------------|-----------------|---------------------|---------------------|
| <b>Sample Name</b>                                            | <b>Read length(bp)</b> | <b>Clean Reads</b> | <b>Clean bases</b> | <b>Q20(%)</b> | <b>GC(%)</b> | <b>Depth(x)</b> | <b>Mapped Reads</b> | <b>Mapped ratio</b> |
| <b>Col-0</b>                                                  | 90                     | 97,347,534         | 8,761,278,060      | 99.47;99.72   | 25.64        | 58              | 89,350,773          | 91.79%              |
| <b>clsy4-1</b>                                                | 90                     | 99,441,528         | 8,949,737,520      | 99.52;99.62   | 26.32        | 60              | 92,260,137          | 92.78%              |
| <b>clsy4-1/nrpd1-3</b>                                        | 90                     | 96,645,602         | 8,698,104,180      | 99.47;99.73   | 25.77        | 58              | 88,949,959          | 92.04%              |
| <b>clsy1-3</b>                                                | 90                     | 94,908,790         | 8,541,791,100      | 99.50;99.63   | 27.04        | 57              | 86,233,177          | 90.86%              |
| <b>clsy2-1</b>                                                | 90                     | 96,278,326         | 8,665,049,340      | 99.54;99.59   | 26.28        | 58              | 81,265,311          | 84.41%              |
| <b>clsy3-1</b>                                                | 90                     | 97,817,498         | 8,803,574,820      | 99.49;99.72   | 25.89        | 59              | 89,516,627          | 91.51%              |
| <b>clsy1-3/clsy2-1/clsy3-1</b>                                | 90                     | 96,637,408         | 8,697,366,720      | 99.54;99.69   | 24.74        | 58              | 88,689,955          | 91.78%              |
| <b>clsy1-3/clsy3-1/clsy4-1</b>                                | 90                     | 98,649,196         | 8,878,427,640      | 99.53;99.64   | 26.22        | 59              | 89,188,094          | 90.41%              |
| <b>clsy2-1/clsy3-1/clsy4-1</b>                                | 90                     | 96,425,168         | 8,678,265,120      | 99.43;99.51   | 26.89        | 58              | 87,716,664          | 90.97%              |
| <b>clsy1-3/clsy2-1/clsy3-1/clsy4-1</b>                        | 90                     | 97,113,818         | 8,740,243,620      | 99.54;99.65   | 26.61        | 58              | 90,014,686          | 92.69%              |

**Supplementary Table 3. Mutants used in this study**

| Mutant name       | T-DNA                                                                                         |
|-------------------|-----------------------------------------------------------------------------------------------|
| <i>clsy1-3</i>    |                                                                                               |
| <i>clsy2-1</i>    | SALK_106745                                                                                   |
| <i>clsy3-1</i>    | SALK_040366                                                                                   |
| <i>clsy4-1</i>    | SALK_102252                                                                                   |
| <i>clsy4-2</i>    | SALK_003876                                                                                   |
| <i>ros1-4</i>     | SALK_045303                                                                                   |
| <i>nrpd1-3</i>    | SALK_128428                                                                                   |
| <i>nrpe1-11</i>   | SALK_029919                                                                                   |
| <i>dtf1-2</i>     | SALK_074540                                                                                   |
| <i>clsy4nrpd1</i> | <i>clsy4-1/nrpd1-3</i> (SALK_102252/SALK_128428)                                              |
| <i>clsy4nrpe1</i> | <i>clsy4-1/nrpe1-11</i> (SALK_102252/SALK_029919)                                             |
| <i>clsy4ros1</i>  | <i>clsy4-1/ros1-4</i> (SALK_102252/SALK_029919)                                               |
| <i>ros1nrpd1</i>  | <i>ros1-4/nrpe1-11</i> (SALK_045303/SALK_128428)                                              |
| <i>ros1nrpe1</i>  | <i>ros1-4/nrpe1-11</i> (SALK_045303/SALK_029919)                                              |
| <i>clsy12</i>     | <i>clsy1-3/clsy2-1</i> ( <i>clsy1-3</i> /SALK_106745)                                         |
| <i>clsy34</i>     | <i>clsy3-1/clsy4-1</i> (SALK_040366/SALK_102252)                                              |
| <i>clsy123</i>    | <i>clsy1-3/clsy2-1/clsy3-1</i> ( <i>clsy1-3</i> /SALK_106745/SALK_040366)                     |
| <i>clsy134</i>    | <i>clsy1-3/clsy3-1/clsy4-1</i> ( <i>clsy1-3</i> /SALK_040366/SALK_102252)                     |
| <i>clsy234</i>    | <i>clsy2-1/clsy3-1/clsy4-1</i> (SALK_106745/SALK_040366/SALK_102252)                          |
| <i>clsy1234</i>   | <i>clsy1-3/clsy2-1/clsy3-1/clsy4-1</i> ( <i>clsy1-3</i> /SALK_106745/SALK_040366/SALK_102252) |

**Supplementary Table 4. Oligos used in this study**

| <b>Oligos Name</b> | <b>Oligos Sequence</b>      | <b>Experiments</b> |
|--------------------|-----------------------------|--------------------|
| <i>clsy1-3F</i>    | GACCTATTGGGAATGTGGTTCAT     | genotyping         |
| <i>clsy1-3R</i>    | CCGATTTCTTCATTCAATTCATAG    | genotyping         |
| <i>clsy2-1F</i>    | TAGCCATGTATTTCCGGTGAG       | genotyping         |
| <i>clsy2-1R</i>    | AGTGTTGTTGACCAGTGGGAG       | genotyping         |
| <i>clsy3-1F</i>    | CTTCTTGCAGTGGCATTCTTC       | genotyping         |
| <i>clsy3-1R</i>    | ATTAGGCGAAGAGGATGAAGC       | genotyping         |
| <i>clsy4-1F</i>    | CTATGGAAACTCCTCCGTTCC       | genotyping         |
| <i>clsy4-1R</i>    | TGATGCTTGTTCACCTTCTCC       | genotyping         |
| <i>clsy4-2F</i>    | ACGACTTGTCTCGGATGATG        | genotyping         |
| <i>clsy4-2R</i>    | TTCGGATATGCGATGTTTCTC       | genotyping         |
| <i>nrpd1-3F</i>    | GATCTGTTCACTTGCTCGTC        | genotyping         |
| <i>nrpd1-3R</i>    | TTAATGTTCTTCATGCGGGAC       | genotyping         |
| <i>nrpe1-11F</i>   | TTTTCTCCAAGTTGTGATCG        | genotyping         |
| <i>nrpe1-11R</i>   | AACAAGACCCAACGACTGTTG       | genotyping         |
| <i>ros1-4F</i>     | CCAGTTAAGGACAGAACACCG       | genotyping         |
| <i>ros1-4R</i>     | TCGTCTTTCGATCAAATCCAC       | genotyping         |
| LB1.3              | ATTTTGCCGATTTTCGGAAC        | genotyping         |
| AT5TE25535-RealF   | GTCGTTGTTCTTCTGAGTGTTG      | real-time PCR      |
| AT5TE25535-RealR   | CGGTTTCTCTCATACTCTCCTTT     | real-time PCR      |
| AtSN1-RealF        | CCAGAAATTCATCTTCTTTGGAAAAG  | real-time PCR      |
| AtSN1-RealR        | GCCCAGTGGTAAATCTCTCAGATAGA  | real-time PCR      |
| AT2TE07550-RealF   | GTCCCTCGAGCAACAATACTAA      | real-time PCR      |
| AT2TE07550-RealR   | ATGATGGATGGTAAGGCATAGAG     | real-time PCR      |
| AT4TE27915-RealF   | GTCACGCACTCACCTTAACA        | real-time PCR      |
| AT4TE27915-RealR   | GGACTTGTTGTAGGACGTTTCT      | real-time PCR      |
| AT5TE35950-RealF   | CTAACGTCATTACATACACATCTTG   | real-time PCR      |
| AT5TE35950-RealR   | TTGTTGATGTGAACTTTCATCC      | real-time PCR      |
| CLSY4-RealF        | TGGGCCAGCAACATTAGGAACTCT    | real-time PCR      |
| CLSY4-RealR        | TCCACTGATGCGGATGAAGTCGAT    | real-time PCR      |
| ROS1-RealF         | AAGGACCAACTTGTTGCGAC        | real-time PCR      |
| ROS1-RealR         | AGGACTCTATTAGCACTGAGC       | real-time PCR      |
| IGN5-RealF         | AAGCCCAAACCATACTAATAATCTAAT | real-time PCR      |
| IGN5-RealR         | CCGAATAACAGCAAGTCCTTTTAATA  | real-time PCR      |
| IGN6-RealF         | TTTCGCCGTCCTAACAATGTAATG    | real-time PCR      |
| IGN6-RealR         | GAAGTAGCTTTTTTCGGTCCAGTTC   | real-time PCR      |
| IGN20-RealF        | AAGAACCGGACCAATACGG         | real-time PCR      |
| IGN20-RealR        | CCACCGCCTCTATTGAAATG        | real-time PCR      |
| IGN22-RealF        | TGGTCCATAGGTTCCGGAATTT      | real-time PCR      |
| IGN22-RealR        | GGCATGGTTTGATATCAGGAG       | real-time PCR      |
| IGN25-RealF        | AAACCCACCTCTTTAGGTCCA       | real-time PCR      |
| IGN25-RealR        | GGCTTGGAGAGTCCAACAAT        | real-time PCR      |
| IGN27-RealF        | CGTTGTTCCGCTAATTCTG         | real-time PCR      |
| IGN27-RealR        | GCCAGGAAACCCTAACTTCC        | real-time PCR      |
| IGN29-RealF        | CGTTTGTATTATGTAGGGCGAAAG    | real-time PCR      |
| IGN29-RealR        | TAAAACCTTTTCCCGCCAACCA      | real-time PCR      |
| IGN31-RealF        | CAATCTGGCACACACGAAAC        | real-time PCR      |
| IGN31-RealR        | CAGGTTGGATCTGTTGACGA        | real-time PCR      |

|                           |                           |               |
|---------------------------|---------------------------|---------------|
| Actin2-RealF              | GAGAGATTCAGATGCCCAGAAGTC  | real-time PCR |
| Actin2-RealR              | TGGATTCCAGCAGCTTCCA       | real-time PCR |
| At1g51170-RealF           | TCGTCTCCTTCCTTCTCATCT     | real-time PCR |
| At1g51170-RealR           | ACTTTGAGTCTGTCTGAGGTTAAG  | real-time PCR |
| At1g63950-RealF           | GATTGTGTGGATGGGTGTTTATG   | real-time PCR |
| At1g63950-RealR           | AGATGAGTGAATCCGGGTAAG     | real-time PCR |
| At1g65610-RealF           | TAGCTGCTCTCGTTTCCTTAAC    | real-time PCR |
| At1g65610-RealR           | TCAAGGCTTCCAGGCTTTAG      | real-time PCR |
| At2g27229-RealF           | CATCTTCTAAATCGCCACTCCT    | real-time PCR |
| At2g27229-RealR           | TCCCTCACAAATGATCTCTCTCT   | real-time PCR |
| AT3g20690-RealF           | TCTCTCTAGGCTTCCGTTGATA    | real-time PCR |
| AT3g20690-RealR           | TACATTGCCGATGTGCTTATTTG   | real-time PCR |
| AT3g25670RealF            | GGAGAAGGCAGAGGATAGTTTG    | real-time PCR |
| AT3g25670RealR            | CTAGTAACCATCACACCCATTGA   | real-time PCR |
| At3g47540RealF            | TGCCTCGTAGGTCCTTGTATAG    | real-time PCR |
| At3g47540RealR            | CCATTACCGGCTTGGTTGATAA    | real-time PCR |
| At5g39550RealF            | TCCAAGACCGTTGCCTAATG      | real-time PCR |
| At5g39550RealR            | GACCCTCAGCTTCATCGAAAT     | real-time PCR |
| AT5g44910RealF            | CGAGGAACTGAGGGAGAAATAC    | real-time PCR |
| AT5g44910RealR            | TGCCCTCACAAGACCTAAAC      | real-time PCR |
| At2g45380RealF            | CAACTCAAGTGGTGGTGTAGAG    | real-time PCR |
| At2g45380RealR            | GAATTGCCTTTCATGCTTCTT     | real-time PCR |
| At4g11790RealF            | ACGCCATCCAAGAATACG        | real-time PCR |
| At4g11790RealR            | AGAGAGAGGACGACTCGATAAG    | real-time PCR |
| AT5g39850RealF            | AAGCCACGTCGTCCTTATG       | real-time PCR |
| AT5g39850RealR            | TTGAACTCTCCAAGCTCTCTC     | real-time PCR |
| PM36-ChIP-1F              | CACATAACCGGTGGAGGATT      | ChIP assay    |
| PM36-ChIP-1R              | GTAGCTCGATCCAAGAGCTTTC    | ChIP assay    |
| PM36-ChIP-2F              | GTGTCAAGTAACCCGAGAGAG     | ChIP assay    |
| PM36-ChIP-2R              | GATCTTAGCTTCATCCACGTTTG   | ChIP assay    |
| PM36-ChIP-3F              | ACCACTCGGATTGATTCCAATA    | ChIP assay    |
| PM36-ChIP-3R              | GACGCAAAGGAAAACAGAGAATAAG | ChIP assay    |
| PM36-ChIP-4F              | GTAAGGTCCCAGCAACTTCATAA   | ChIP assay    |
| PM36-ChIP-4R              | CCGAAAGGAAACTTGTTCATC     | ChIP assay    |
| PM27-ChIP-1F              | ATTACACGAACCGGAGGAATG     | ChIP assay    |
| PM27-ChIP-1R              | GGGAATTTGAAGAGATTGATGGATG | ChIP assay    |
| PM27-ChIP-2F              | TTTACACGAACCGGAGGAATAC    | ChIP assay    |
| PM27-ChIP-2R              | GGTGAGACAAACGTGGATGA      | ChIP assay    |
| ID2-ChIP-1F               | AGGCATGTTTCCATGTTTGATG    | ChIP assay    |
| ID2-ChIP-1R               | TCCAGTGATGACAGGATCTTATTG  | ChIP assay    |
| ID2-ChIP-2F               | GCTGCGAGGAACTGAAATTG      | ChIP assay    |
| ID2-ChIP-2R               | TGCTCTGGTTGGTATGTGTATAA   | ChIP assay    |
| ID19-ChIP-1F              | CTATCGGCTGATATGGTCAGTTT   | ChIP assay    |
| ID19-ChIP-1R              | TGACCTCCTGACAAACATTCC     | ChIP assay    |
| ID19-ChIP-2F              | TCTCTAAAGGGCCACCATACT     | ChIP assay    |
| ID19-ChIP-2R              | ACTTGGACCAAAGGCTCAAC      | ChIP assay    |
| <i>clsy4</i> -hyperDMR-1F | CCAAACGCCACAGAGAGTAA      | ChIP assay    |
| <i>clsy4</i> -hyperDMR-1R | CGCTTGGATTGCTTCCAATATC    | ChIP assay    |
| <i>clsy4</i> -hyperDMR-2F | ACTAAACTCTACAGAATTTGTTGGC | ChIP assay    |

|                            |                                    |            |
|----------------------------|------------------------------------|------------|
| <i>clsy4</i> -hyperDMR-2R  | GGTAATATTGGGTTAGTCTAGGTGAT         | ChIP assay |
| <i>clsy4</i> -hyperDMR-3F  | TCTCCGCTTCTCTATTCCAAAC             | ChIP assay |
| <i>clsy4</i> -hyperDMR-3R  | AGGGACTCAACAACCTTCAT               | ChIP assay |
| <i>clsy4</i> -hyperDMR-4F  | GGGCTACTTGTTGTATACCTTGA            | ChIP assay |
| <i>clsy4</i> -hyperDMR-4R  | TCAGACAATCAGAACCCGAAATA            | ChIP assay |
| <i>clsy4</i> -hyperDMR-5F  | CATCGGACATACAAACCTGAAAC            | ChIP assay |
| <i>clsy4</i> -hyperDMR-5R  | CTGGAGAAGCTGAAACACTTTG             | ChIP assay |
| <i>clsy4</i> -hyperDMR-6F  | ACACATAGTCTCTTCGCTTGAC             | ChIP assay |
| <i>clsy4</i> -hyperDMR-6R  | CCGAGCTGCTTGATGACTT                | ChIP assay |
| <i>clsy4</i> -hyperDMR-7F  | CCTTCTGATGAGTGTTAGGTTCT            | ChIP assay |
| <i>clsy4</i> -hyperDMR-7R  | TCAATTGGTAATAGGTGGAGTGA            | ChIP assay |
| <i>clsy4</i> -hyperDMR-8F  | AAAGCTCCGATGTTTGGATAGA             | ChIP assay |
| <i>clsy4</i> -hyperDMR-8R  | CACATGATTTGGTGGAGGAGA              | ChIP assay |
| <i>clsy4</i> -hyperDMR-9F  | TAGAGCAACTCCAACCTTGATC             | ChIP assay |
| <i>clsy4</i> -hyperDMR-9R  | GCTAAGGCTTGTTGGTTTCATT             | ChIP assay |
| <i>clsy4</i> -hyperDMR-10F | CAGTCAAGCTTCCTTGTTTCATTAC          | ChIP assay |
| <i>clsy4</i> -hyperDMR-10R | ATGCATGGTTGCCCATCT                 | ChIP assay |
| Tublin8-RealF              | ATAACCGTTTCAAATTCTCTCTCTC          | ChIP assay |
| Tublin8-RealR              | TGCAAATCGTTCTCTCCTTG               | ChIP assay |
| <i>ros1</i> -hyperDMR-1F   | CCAAGAAGCCAAGCAGGAAA               | ChIP assay |
| <i>ros1</i> -hyperDMR-1R   | TGCTTGAATCGGTGTCTTCG               | ChIP assay |
| <i>ros1</i> -hyperDMR-2F   | ACAGTGTTTCGTAAAGATGTAGCC           | ChIP assay |
| <i>ros1</i> -hyperDMR-2R   | AGCACATCACAATGAACGTA               | ChIP assay |
| <i>ros1</i> -hyperDMR-3F   | AACTCAGGCAACGGTATGGT               | ChIP assay |
| <i>ros1</i> -hyperDMR-3R   | CCGCGTCGAGGAAATAAGTC               | ChIP assay |
| <i>ros1</i> -hyperDMR-4F   | TGGTCCAAATTATTTCTCCAAAGACA         | ChIP assay |
| <i>ros1</i> -hyperDMR-4R   | TATATCAGGCGGGAGCGTAG               | ChIP assay |
| DTF1-ChIP-1F               | GATCTACCAACGAACCTCCATC             | ChIP assay |
| DTF1-ChIP-1R               | TCCTCCTTCTTTGTGGCTTAAT             | ChIP assay |
| DTF1-ChIP-2F               | CGCCTACCTCTGTACCTTCTTA             | ChIP assay |
| DTF1-ChIP-2R               | CTGGTGGATTTCTTCGTCAGTC             | ChIP assay |
| DTF1-ChIP-3F               | TAGCTAATAACATAAGAGTGCACCA          | ChIP assay |
| DTF1-ChIP-3R               | AAACCGACTATCGTTTCTTATCTCT          | ChIP assay |
| DTF1-ChIP-4F               | CCCATATTGAAACGGTGGATTA             | ChIP assay |
| DTF1-ChIP-4R               | TGGTGCACCTTATGTTATTAGC             | ChIP assay |
| DTF1-ChIP-5F               | CACGTGGAATTCAGTGGATGA              | ChIP assay |
| DTF1-ChIP-5R               | CGTCCTGTATCATCACATCAGC             | ChIP assay |
| DTF1-ChIP-6F               | TGTTATTAAGTAACGTCATTCCAAACCC       | ChIP assay |
| DTF1-ChIP-6R               | ATTAGCGGTGTACTGCGGTT               | ChIP assay |
| DTF1-ChIP-7F               | GGCTTATTGTACATTATCTCGATCTC         | ChIP assay |
| DTF1-ChIP-7R               | TGTTACCGACAATACCCTAACCC            | ChIP assay |
| IGN5-ChopF                 | TCCCGAGAAGAGTAGAACAATGCTAAAA       | Chop-PCR   |
| IGN5-ChopR                 | CTGAGGTATTCCATAGCCCCTGATCC         | Chop-PCR   |
| Solo-LTR-ChopF             | ATTAACCACACGCTGCATCTAAT            | Chop-PCR   |
| Solo-LTR-ChopR             | GAGAGACGATCGTGCTGATAAC             | Chop-PCR   |
| AtSN1-ChopF                | ACTTAATTAGCACTCAAATTAACAAAATAAGT   | Chop-PCR   |
| AtSN1-ChopR                | TTTAAACATAAGAAGAAGTTCCTTTTTCATCTAC | Chop-PCR   |

|              |                                  |                       |
|--------------|----------------------------------|-----------------------|
| PM36-ChopF   | TGACCTGCATAGGCTATAACACA          | Chop-PCR              |
| PM36-ChopR   | ATTGGAATCAATCCGAGTGG             | Chop-PCR              |
| PM27-ChopF   | ATAGATCCTAATAGAGGCGTAA           | Chop-PCR              |
| PM27-ChopR   | AGAATAACAAATGGCACAGA             | Chop-PCR              |
| Pm36-Bis-F   | GTAGTTTGAGATGATTAATGATAGAGTT     | Bisulphite sequencing |
| Pm36-Bis-R   | AAACTTATTCAATCTTCAATACTCTAC      | Bisulphite sequencing |
| Pm27-Bis-F   | GATTATTTAGTYGGTATTTYGAYGAGT      | Bisulphite sequencing |
| Pm27-Bis-R   | CCAAAAAATACTTAAATCCATAAATCTTAA   | Bisulphite sequencing |
| ID2-Bis-F    | AGGGGTAAAATGAGAGGATTAATTTA       | Bisulphite sequencing |
| ID2-Bis-R    | CTCTTACCTCTAAATTATATAACATT       | Bisulphite sequencing |
| ID19-Bis-F   | GATAGAAATGTATGAATTTTTTTAGAG      | Bisulphite sequencing |
| ID19-Bis-R   | TCACAAAATAACTACAAAATATATAT       | Bisulphite sequencing |
| ID30-Bis-F   | GTATGTTTTTTTATATATAAAAGAGAGT     | Bisulphite sequencing |
| ID30-Bis-R   | ATCTTATCCTCATTAATCACACATAACA     | Bisulphite sequencing |
| CLSY4-F      | ATGAATTCGAAGCTAAAATCAAGCAAAAAACG | Gene cloning          |
| CLSY4-R      | TATCTAGAGAAGAAGCTGGTATTCATGTCAG  | Gene cloning          |
| Pm36-probeF  | TGACCTGCATAGGCTATAACACA          | Northern blotting     |
| Pm36-probeR  | ATTGGAATCAATCCGAGTGG             | Northern blotting     |
| ID2-probeF   | AAGATCCTGTCATCACTGGAAAA          | Northern blotting     |
| ID2-probeR   | TGGTGACAGTGCTTGTGGTT             | Northern blotting     |
| ID19-probeF  | TTCTCTCTAAAGGGCCACCA             | Northern blotting     |
| ID19-probeR  | TCTATCCGAACATTGGCACA             | Northern blotting     |
| miR171-probe | GATATTGGCGCGGCTCAATCA            | Northern blotting     |
| DD1-probeF   | CGGGATCGATAGGATCTTCA             | Northern blotting     |
| DD1-probeR   | GTTTTGCCTCTTTGGTGGTC             | Northern blotting     |
| DD2-probeF   | CCTTTCTCTTGTTCCGCCCTA            | Northern blotting     |
| DD2-probeR   | CAAGGTTTCGGGAAAAGATCA            | Northern blotting     |
| DD3-probeF   | CTCTCCACATGTTTTGGGTTA            | Northern blotting     |
| DD3-probeR   | TTCCAAGATGAGAACTGCACA            | Northern blotting     |
| DD12-probeF  | CGGTGATGCAAACGGATAG              | Northern blotting     |
| DD12-probeR  | TGGCAAACTAACGCACAAA              | Northern blotting     |
| miR167-probe | TAGATCATGCTGGCAGCTTCA            | Northern blotting     |
